# Supplementary material
Source: PubMed Central journal article supplement (PMC8087174)
Supplement: NIHMS1696063-supplement-pmic12871-sup-0001-suppmat.pdf [file NIHMS1696063-supplement-pmic12871-sup-0001-suppmat.pdf]

# PROTEOMICS

**Supporting Information**

**for Proteomics**

**DOI 10.1002/pmic.201700442**

Tingting Jiang, Michael E. Hoover, Matthew V. Holt, Michael A. Freitas,  
Alan G. Marshall and Nicolas L. Young

**Middle-Down Characterization of the Cell Cycle Dependence of Histone H4  
Posttranslational Modifications and Proteoforms**

**Figure S1**

**MCF-10A**

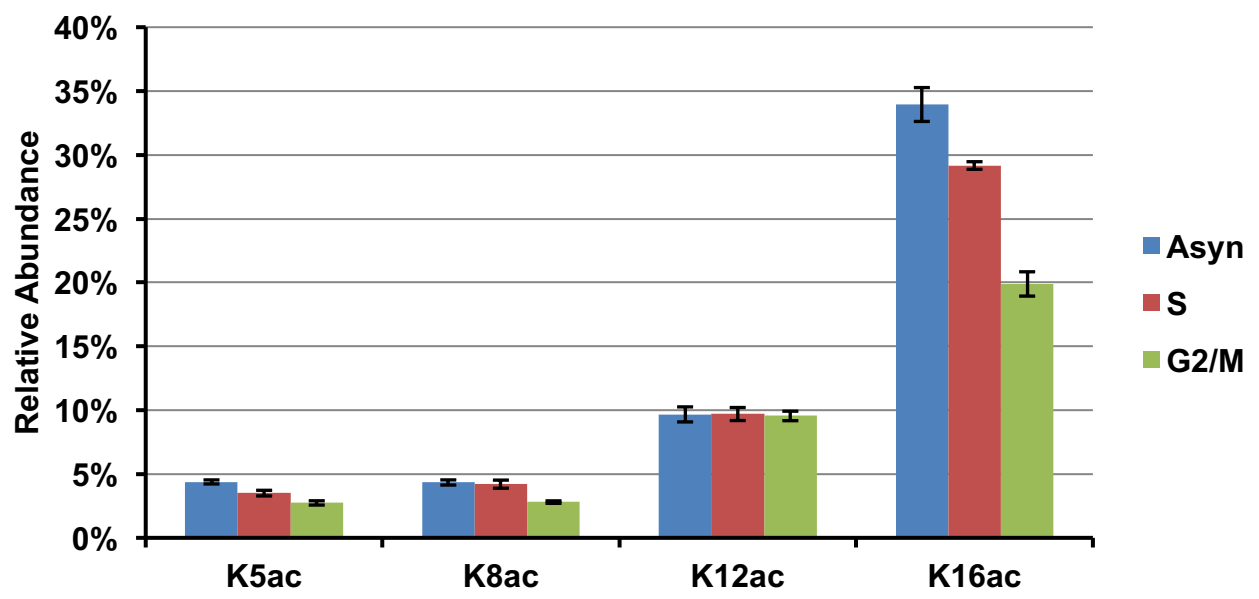

**MDA-MB-231**

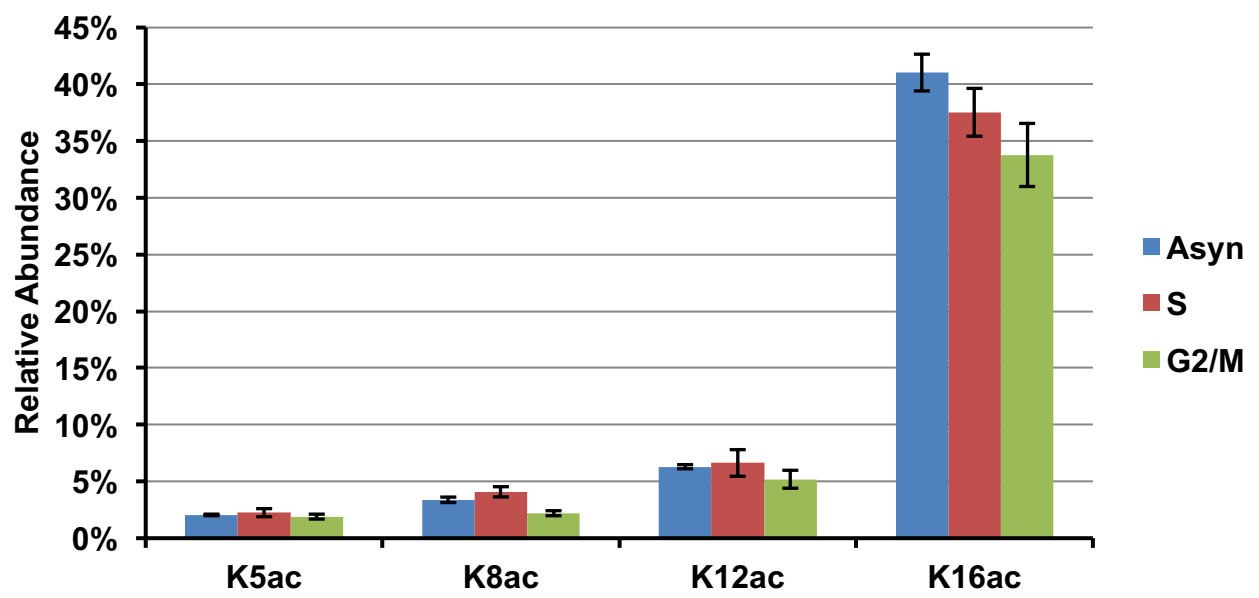

Figure S2

### S vs. G2/M in MCF10A Cells

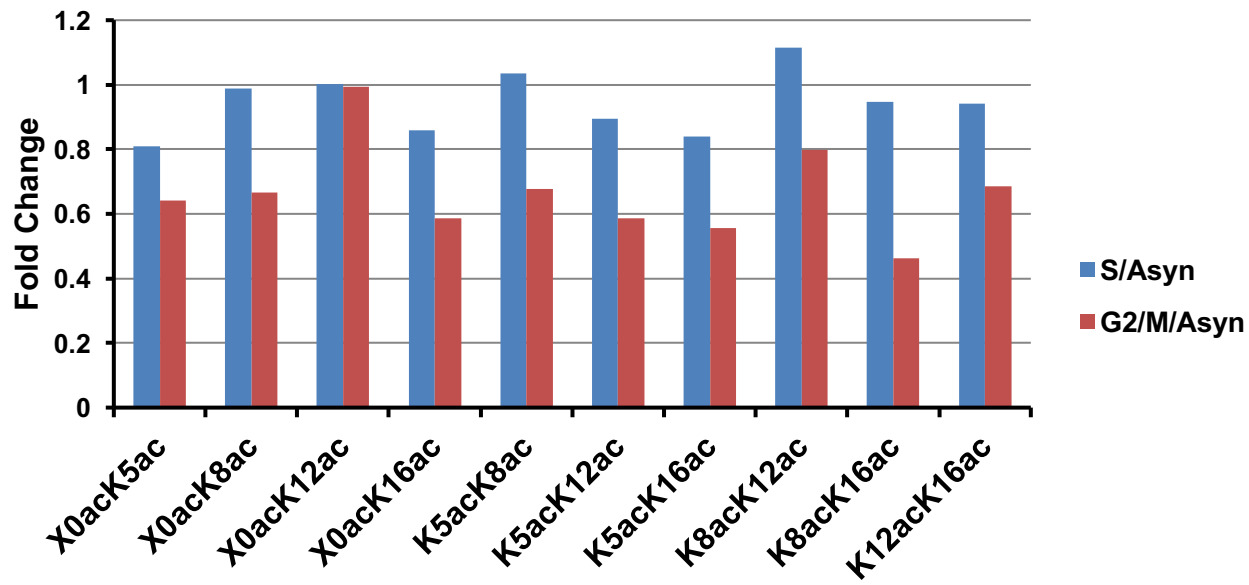

### S vs. G2/M in MDA-MB-231 Cells

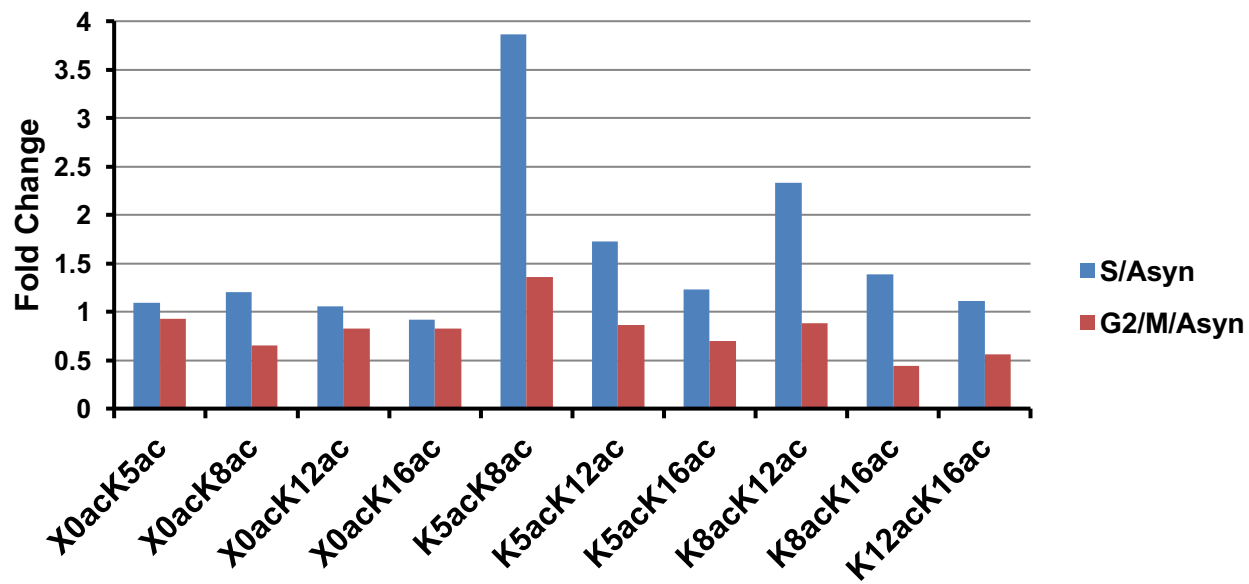

Figure S3

### S vs. G2/M in MCF10A Cells

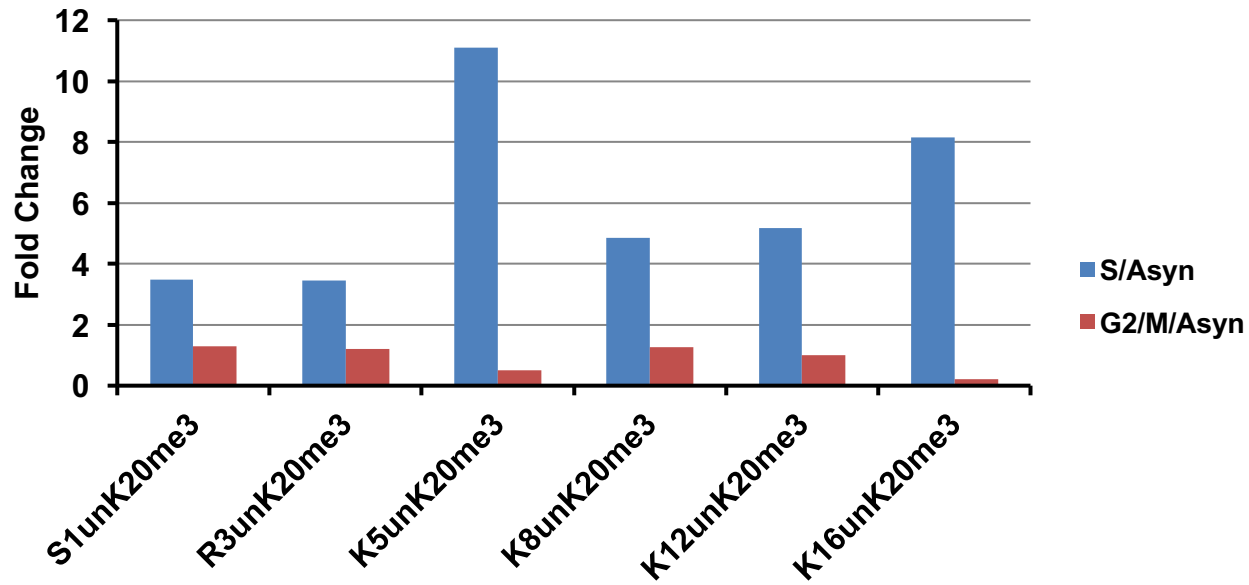

### S vs. G2/M in MDA-MB-231 Cells

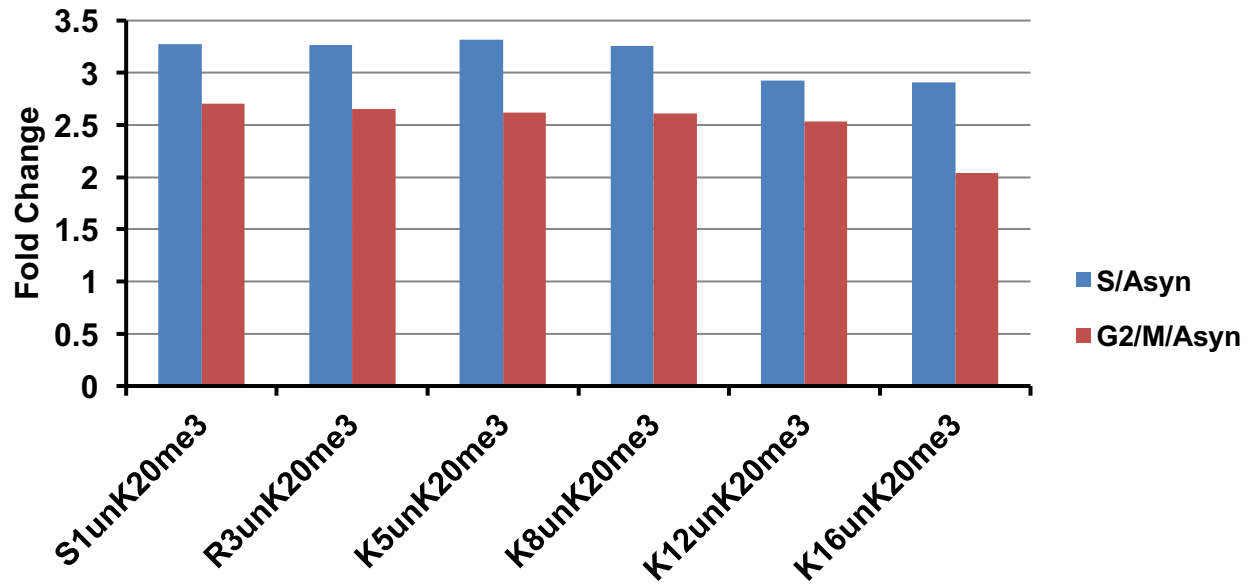

## Supplemental Table 1. Proteoforms Measured

| Proteoform                            | Average  |          |          |          |          |          | STDEV    |          |          |          |          |          |
|---------------------------------------|----------|----------|----------|----------|----------|----------|----------|----------|----------|----------|----------|----------|
|                                       | G1       |          | S        |          | M        |          | G1       |          | S        |          | M        |          |
|                                       | MB_asyn  | 10A_asyn | MB_thy   | 10A_thy  | MB_Noc   | 10A_Noc  | MB_asyn  | 10A_asyn | MB_thy   | 10A_thy  | MB_Noc   | 10A_Noc  |
| X0acS1unR3unK5unK8unK12unK16unK20me2  | 0.402006 | 0.403347 | 0.463852 | 0.53441  | 0.536996 | 0.648174 | 0.006394 | 0.015293 | 0.025223 | 0.007039 | 0.066955 | 0.016845 |
| X0acS1unR3unK5unK8unK12unK16ack20me2  | 0.241286 | 0.179344 | 0.230928 | 0.181132 | 0.236864 | 0.139444 | 0.023938 | 0.011549 | 0.027835 | 0.007189 | 0.042231 | 0.016136 |
| X0acS1unR3unK5unK8unK12ack16unK20me2  | 0.012392 | 0.021982 | 0.01403  | 0.032816 | 0.019956 | 0.048362 | 0.002577 | 0.002118 | 0.0058   | 0.001078 | 0.003839 | 0.004897 |
| X0acS1unR3unK5unK8unK12unK16unK20me1  | 0.062996 | 0.093599 | 0.021972 | 0.02211  | 0.047036 | 0.039925 | 0.008564 | 0.007147 | 0.00252  | 0.004968 | 0.007829 | 0.002382 |
| X0acS1unR3unK5unK8unK12ack16ack20me2  | 0.026055 | 0.023678 | 0.028597 | 0.027594 | 0.015229 | 0.023738 | 0.001499 | 0.006228 | 0.010662 | 0.008688 | 0.013399 | 0.001653 |
| X0acS1unR3unK5unK8ack12unK16unK20me2  | 0.008807 | 0.01212  | 0.009207 | 0.014653 | 0.009111 | 0.012296 | 0.001668 | 0.001449 | 0.004646 | 0.002898 | 0.001159 | 0.002308 |
| X0acS1unR3unK5ack8unK12unK16unK20me2  | 0.003611 | 0.006501 | 0.003841 | 0.008644 | 0.00742  | 0.011895 | 0.001008 | 0.000678 | 0.002709 | 0.004152 | 0.000416 | 0.000895 |
| X0acS1unR3unK5unK8unK12unK16ack20me1  | 0.061013 | 0.048089 | 0.035276 | 0.014238 | 0.051346 | 0.0103   | 0.004371 | 0.002994 | 0.005375 | 0.001325 | 0.009766 | 0.001319 |
| X0acS1unR3me1K5unK8unK12unK16unK20me2 | 0.003618 | 0.003268 | 0.003058 | 0.003478 | 0.004267 | 0.007667 | 0.000806 | 0.000829 | 0.001197 | 0.002782 | 0.000901 | 0.001922 |
| X0acS1unR3unK5unK8unK12ack16unK20me1  | 0.00302  | 0.005601 | 0.001353 | 0.002326 | 0.004866 | 0.004435 | 0.000999 | 0.000459 | 0.001564 | 0.000417 | 0.001506 | 0.001557 |
| X0acS1unR3unK5unK8unK12unK16unK20un   | 0.078625 | 0.074562 | 0.055286 | 0.05677  | 0.005244 | 0.004805 | 0.015322 | 0.010165 | 0.013573 | 0.007881 | 0.001818 | 0.000213 |
| X0acS1unR3unK5unK8ack12ack16unK20me2  | 0.002213 | 0.003727 | 0.003452 | 0.005265 | 0.002358 | 0.005648 | 0.000612 | 0.000165 | 0.001913 | 0.001155 | 0.000944 | 0.000593 |
| X0acS1phR3unK5unK8unK12unK16unK20me2  | 0.00027  | 0.000577 | 0.000579 | 0.001211 | 0.003244 | 0.007039 | 0.000346 | 4.01E-05 | 0.000816 | 0.000435 | 0.001397 | 0.003105 |
| X0acS1unR3unK5ack8unK12unK16ack20me2  | 0.00696  | 0.008209 | 0.006692 | 0.008196 | 0.005267 | 0.00418  | 0.00092  | 0.000428 | 0.001451 | 0.001996 | 0.00238  | 0.000569 |
| X0acS1unR3unK5unK8unK12unK16ack20un   | 0.037489 | 0.033075 | 0.031369 | 0.02219  | 0.007175 | 0.001936 | 0.004934 | 0.002156 | 0.005643 | 0.000856 | 0.002364 | 0.001192 |
| X0acS1unR3unK5unK8ack12unK16ack20me2  | 0.011688 | 0.007197 | 0.013228 | 0.00694  | 0.005099 | 0.003394 | 0.002182 | 0.001922 | 0.003303 | 0.002312 | 0.003449 | 0.000658 |
| X0acS1unR3unK5ack8ack12unK16ack20me3  | 6.67E-06 | 0.001645 | 8.63E-06 | 0.0021   | 7.35E-05 | 0.002264 | 3.08E-06 | 0.000395 | 1.61E-06 | 0.000842 | 5.6E-05  | 0.00083  |
| X0acS1unR3unK5ack8unK12ack16ack20me3  | 7.24E-06 | 0.001773 | 6.06E-06 | 0.002097 | 1.48E-05 | 0.002963 | 4.63E-06 | 0.000449 | 2.57E-06 | 0.000887 | 1.22E-05 | 0.000838 |
| X0acS1unR3unK5ack8unK12ack16unK20me2  | 0.000621 | 0.00086  | 0.000882 | 0.002017 | 0.000652 | 0.002249 | 0.00024  | 2.56E-05 | 0.000656 | 0.000153 | 0.0003   | 0.000434 |
| X0acS1unR3unK5unK8unK12ack16ack20me1  | 0.00531  | 0.00706  | 0.000972 | 0.00263  | 0.00404  | 0.001739 | 0.001209 | 0.000691 | 0.000532 | 0.000533 | 0.002451 | 0.000454 |
| X0acS1unR3unK5unK8ack12ack16ack20me2  | 0.000855 | 0.002808 | 0.004511 | 0.004061 | 0.000811 | 0.001891 | 4.31E-05 | 0.001086 | 0.003348 | 0.000582 | 0.000764 | 0.000772 |
| X0acS1unR3unK5ack8unK12ack16ack20me2  | 0.000198 | 0.001765 | 0.001436 | 0.001999 | 0.000369 | 0.00093  | 5.62E-05 | 0.000113 | 0.001105 | 0.000476 | 0.000311 | 0.000142 |
| X0unS1unR3unK5unK8unK12unK16unK20me2  | 0.000215 | 0.001287 | 0.0348   | 0.00152  | 0.013421 | 0.004189 | 0.0003   | 0.000381 | 0.045609 | 0.000573 | 0.008882 | 0.003354 |
| X0acS1unR3unK5ack8unK12unK16unK20me1  | 0.000543 | 0.00115  | 0.000273 | 0.000512 | 0.000644 | 0.00021  | 0.000119 | 0.000209 | 0.000204 | 0.000396 | 0.000533 | 0.000416 |
| X0acS1unR3unK5unK8unK12ack16unK20un   | 0.002518 | 0.008748 | 0.000833 | 0.004445 | 6.64E-05 | 0.000373 | 0.000355 | 0.001328 | 0.000717 | 0.000899 | 4.48E-05 | 0.000239 |
| X0acS1unR3unK5unK8ack12unK16unK20me1  | 0.001706 | 0.002331 | 0.000347 | 0.000588 | 0.001223 | 0.000479 | 0.000856 | 0.000175 | 0.000515 | 0.000244 | 0.000859 | 0.000441 |
| X0acS1unR3unK5unK8ack12unK16ack20me1  | 0.002171 | 0.002394 | 0.001629 | 0.001305 | 0.001204 | 0.000544 | 0.000443 | 0.000856 | 0.000776 | 0.000645 | 0.000875 | 0.000126 |
| X0acS1unR3unK5unK8unK12ack16ack20un   | 0.006124 | 0.007131 | 0.004896 | 0.004383 | 0.001072 | 0.000718 | 0.000441 | 0.001184 | 0.002489 | 0.000904 | 0.001257 | 0.000244 |
| X0acS1unR3me1K5unK8unK12unK16ack20me2 | 0.001731 | 0.002082 | 0.002063 | 0.00367  | 0.003328 | 0.001888 | 0.000456 | 0.000427 | 0.00065  | 0.000944 | 0.001685 | 0.000969 |
| X0acS1unR3unK5unK8unK12ack16unK20me3  | 1.67E-08 | 3.73E-05 | 6.59E-06 | 0.000319 | 1.26E-05 | 9.56E-05 | 1.53E-08 | 3.49E-05 | 5.48E-06 | 4.48E-05 | 1.99E-05 | 0.000189 |
| X0acS1unR3unK5unK8ack12ack16unK20me1  | 0.000631 | 0.000491 | 0.00011  | 0.000154 | 0.000283 | 0.000312 | 0.000309 | 0.000228 | 9.44E-05 | 0.000165 | 0.000271 | 0.000167 |
| X0acS1unR3me1K5ack8unK12unK16unK20me2 | 2.85E-05 | 0.000178 | 3.66E-05 | 0.000158 | 8.92E-05 | 0.000157 | 3.04E-05 | 0.000151 | 4.09E-05 | 6.42E-05 | 8.31E-05 | 0.000182 |
| X0acS1unR3unK5ack8unK12unK16ack20un   | 0.003382 | 0.003454 | 0.002883 | 0.00101  | 0.000804 | 0.000319 | 0.001378 | 0.000455 | 0.000971 | 0.00043  | 0.000914 | 9.39E-05 |
| X0acS1phR3unK5unK8unK12unK16ack20me2  | 2.07E-05 | 0.00084  | 0.000158 | 0.000104 | 0.001066 | 0.000875 | 2.44E-05 | 0.000679 | 0.000163 | 5.75E-05 | 0.001678 | 0.00043  |
| X0acS1unR3me1K5unK8unK12ack16ack20me2 | 7.34E-05 | 0.000425 | 0.000133 | 0.000461 | 8.11E-05 | 0.000243 | 4.1E-05  | 4.07E-05 | 8.78E-05 | 0.000253 | 0.000118 | 3.14E-05 |
| X0unS1unR3me1K5unK8unK12unK16unK20me2 | 9.26E-06 | 0.000254 | 0.000221 | 0.000278 | 0.000198 | 0.000301 | 8.9E-06  | 4.28E-06 | 0.000294 | 0.000112 | 0.000213 | 9E-05    |
| X0acS1unR3me1K5unK8ack12unK16unK20me2 | 5.52E-05 | 0.00061  | 0.000118 | 0.000335 | 9.46E-05 | 6.75E-05 | 2.15E-05 | 9.66E-05 | 0.00011  | 8.52E-05 | 5.75E-05 | 7.16E-05 |
| X0acS1unR3unK5ack8unK12unK16ack20me1  | 0.000522 | 0.001298 | 0.000967 | 0.000354 | 0.001165 | 0.000157 | 0.000163 | 0.000353 | 0.001272 | 0.000107 | 0.000932 | 6.37E-05 |
| X0acS1unR3unK5unK8ack12unK16ack20un   | 0.003637 | 0.002416 | 0.003632 | 0.001699 | 0.000707 | 0.000207 | 0.000322 | 0.000378 | 0.001512 | 0.00018  | 0.000497 | 9.05E-05 |

|                                       |          |          |          |          |          |          |          |          |          |          |          |          |
|---------------------------------------|----------|----------|----------|----------|----------|----------|----------|----------|----------|----------|----------|----------|
| X0acS1unR3unK5ack8ack12unK16ack20me2  | 0.000187 | 0.000466 | 0.001081 | 0.000552 | 0.000223 | 0.000122 | 6.56E-05 | 0.000102 | 0.000709 | 5.56E-05 | 0.000197 | 6.83E-06 |
| X0acS1unR3me1K5unK8unK12ack16unK20me2 | 3.33E-09 | 4.07E-05 | 3.28E-06 | 5.2E-05  | 2E-05    | 0.000214 | 5.77E-09 | 2.53E-05 | 7.77E-06 | 6.47E-05 | 3.16E-05 | 0.000121 |
| X0acS1unR3unK5ack8ack12unK16unK20me2  | 8.52E-05 | 0.000256 | 0.000127 | 0.00047  | 0.00016  | 0.000174 | 0.000115 | 0.000119 | 9.88E-05 | 0.000151 | 0.00019  | 8.26E-05 |
| X0acS1unR3unK5unK8ack12ack16ack20me1  | 0.000324 | 0.000711 | 0.000573 | 0.000444 | 0.000292 | 0.000131 | 0.000111 | 0.000129 | 0.000322 | 0.000172 | 0.00024  | 2.56E-05 |
| X0acS1unR3unK5ack8unK12ack16unK20me1  | 0.000172 | 0.000368 | 1.67E-05 | 0.000257 | 0.000324 | 0.000206 | 0.000298 | 0.000305 | 3.45E-05 | 7.6E-05  | 0.000378 | 8.1E-05  |
| X0acS1unR3unK5unK8unK12unK16unK20me3  | 0.000496 | 0.000682 | 0.001443 | 0.007887 | 0.001    | 0.000128 | 0.00029  | 0.000997 | 0.000677 | 0.003338 | 0.000754 | 6.1E-05  |
| X0acS1unR3unK5unK8unK12ack16ack20me3  | 6.87E-06 | 2.77E-05 | 0.00023  | 0.000299 | 9.43E-05 | 0.000133 | 5.65E-06 | 2.89E-05 | 0.000261 | 0.000338 | 8.79E-05 | 9.37E-05 |
| X0acS1phR3unK5unK8unK12ack16unK20me2  | 0        | 0        | 1E-08    | 3.8E-07  | 0.000147 | 0.00013  | 0        | 0        | 2E-08    | 7.07E-07 | 0.000243 | 5.12E-05 |
| X0acS1unR3unK5ack8unK12ack16ack20me1  | 0.000121 | 0.000532 | 0.000377 | 0.00017  | 0.000192 | 9.5E-05  | 3.38E-05 | 3.41E-05 | 0.00031  | 7.93E-05 | 0.000164 | 2.55E-05 |
| X0acS1unR3unK5ack8unK12ack16unK20un   | 0.001164 | 0.00523  | 0.001003 | 0.002117 | 0.000641 | 0.000362 | 0.000754 | 0.001556 | 0.000369 | 0.000431 | 0.000734 | 0.000224 |
| X0acS1unR3unK5unK8ack12ack16unK20un   | 1.67E-08 | 0.000962 | 3.33E-09 | 0.000267 | 2.19E-05 | 1.85E-05 | 1.53E-08 | 0.000526 | 8.16E-09 | 0.000309 | 5.34E-05 | 3.7E-05  |
| X0acS1phR3unK5unK8unK12ack16ack20me3  | 0        | 0        | 0        | 4.7E-07  | 4.75E-07 | 2.99E-05 | 0        | 0        | 0        | 9.4E-07  | 5.94E-07 | 3.57E-05 |
| X0unS1phR3unK5ack8unK12unK16unK20me2  | 1.86E-06 | 5.5E-05  | 3.3E-05  | 4.12E-05 | 3.82E-05 | 6.97E-05 | 3.21E-06 | 7.98E-05 | 2.24E-05 | 4.42E-05 | 4.24E-05 | 3.52E-05 |
| X0acS1unR3unK5ack8unK12ack16ack20un   | 0.000375 | 0.000806 | 0.000786 | 0.000279 | 8.36E-05 | 5.69E-05 | 2.68E-05 | 3.29E-05 | 0.000541 | 5.93E-05 | 7.12E-05 | 1.75E-05 |
| X0acS1unR3unK5unK8ack12unK16unK20un   | 0.000908 | 0.002154 | 0.000566 | 0.001139 | 2.72E-05 | 2.01E-05 | 0.000651 | 0.000705 | 0.000246 | 0.000233 | 2.71E-05 | 2.41E-05 |
| X0acS1phR3unK5ack8ack12unK16unK20me2  | 0        | 0        | 0        | 5.15E-06 | 2.4E-07  | 1.38E-05 | 0        | 0        | 0        | 1.54E-06 | 5.88E-07 | 1.75E-05 |
| X0acS1unR3unK5ack8ack12ack16unK20me2  | 3.91E-05 | 5.92E-05 | 0.000175 | 0.000102 | 1.98E-05 | 4.86E-05 | 1.93E-05 | 3.74E-06 | 0.000113 | 3.73E-05 | 2.65E-05 | 2.19E-05 |
| X0unS1unR3unK5ack8unK12ack16unK20me1  | 2.3E-07  | 0        | 0        | 0        | 0        | 9.68E-06 | 3.98E-07 | 0        | 0        | 0        | 0        | 1.94E-05 |
| X0unS1unR3me1K5unK8unK12unK16ack20me1 | 3.07E-05 | 0.000114 | 7.46E-05 | 4.36E-05 | 4.54E-05 | 3.66E-05 | 1.57E-05 | 4.84E-05 | 5.72E-05 | 7.71E-06 | 3.3E-05  | 1.16E-05 |
| X0acS1unR3unK5unK8ack12ack16ack20un   | 0.000293 | 0.00084  | 0.001423 | 0.000456 | 4.27E-05 | 4.94E-05 | 0.000104 | 0.000167 | 0.001234 | 0.000202 | 4.18E-05 | 2.89E-05 |
| X0unS1unR3unK5unK8unK12unK16ack20me2  | 4.2E-07  | 4.54E-05 | 5.87E-05 | 9.69E-05 | 8.83E-06 | 2.92E-05 | 7.27E-07 | 4.57E-05 | 0.000134 | 0.000117 | 1.74E-05 | 7.57E-06 |
| X0unS1unR3unK5ack8ack12ack16ack20me1  | 6.05E-06 | 8.66E-06 | 9.56E-06 | 3.08E-05 | 4.07E-06 | 2.4E-05  | 2.75E-06 | 1.02E-06 | 7.65E-06 | 1.38E-05 | 3.87E-06 | 1.73E-05 |
| X0unS1unR3unK5unK8unK12ack16ack20me3  | 0        | 4.35E-05 | 2.76E-06 | 4.02E-05 | 4.57E-07 | 4.92E-05 | 0        | 3.47E-05 | 6.73E-06 | 3.54E-05 | 7.09E-07 | 3.68E-05 |
| X0acS1unR3me1K5ack8unK12unK16ack20me2 | 3.13E-07 | 9.95E-06 | 1.33E-07 | 3.43E-05 | 3.73E-06 | 9.02E-06 | 5.08E-07 | 8.41E-06 | 2.37E-07 | 4.01E-05 | 6.97E-06 | 1.1E-05  |
| X0acS1phR3me1K5ack8unK12unK16unK20me2 | 0        | 6.25E-05 | 1.29E-06 | 0.000959 | 3.06E-06 | 5.47E-06 | 0        | 0.000108 | 1.46E-06 | 0.001031 | 5.82E-06 | 1.09E-05 |
| X0unS1phR3me1K5unK8unK12unK16ack20me2 | 1.32E-06 | 0        | 1.33E-06 | 2.03E-05 | 6.59E-06 | 1.58E-05 | 7.1E-07  | 0        | 1.24E-06 | 1.46E-05 | 5E-06    | 1.16E-05 |
| X0unS1unR3unK5unK8ack12unK16ack20me2  | 1.3E-05  | 7.52E-05 | 0.000115 | 0.000118 | 1.15E-06 | 5.01E-05 | 2.07E-05 | 9.19E-05 | 0.000128 | 0.000135 | 2.82E-06 | 8.13E-05 |
| X0unS1phR3unK5unK8ack12unK16unK20me2  | 1.7E-06  | 7.09E-05 | 1.87E-05 | 2.89E-05 | 2.22E-05 | 2.55E-05 | 2.94E-06 | 1.91E-05 | 2.12E-05 | 3.54E-05 | 2.86E-05 | 4.87E-06 |
| X0acS1unR3me1K5unK8ack12unK16ack20me2 | 2.36E-06 | 4.96E-05 | 1.02E-05 | 1.95E-05 | 2.23E-07 | 1.35E-05 | 2.15E-06 | 1.55E-05 | 1.58E-05 | 3.4E-05  | 1.77E-07 | 7.55E-06 |
| X0acS1unR3unK5unK8ack12unK16ack20me3  | 3.67E-08 | 0        | 5.09E-06 | 9.2E-05  | 2.07E-07 | 5.88E-06 | 3.21E-08 | 0        | 5.45E-06 | 5.83E-05 | 2.41E-07 | 8.24E-06 |
| X0unS1unR3unK5unK8unK12unK16unK20me1  | 6.23E-06 | 0.000157 | 0.002323 | 4.51E-05 | 0.00148  | 0.000143 | 1.02E-05 | 8.29E-05 | 0.003383 | 2.7E-05  | 0.001219 | 0.000134 |
| X0acS1phR3unK5unK8unK12ack16ack20me2  | 5.32E-05 | 2E-08    | 6.04E-05 | 5.08E-06 | 6.27E-05 | 4.74E-05 | 8.69E-06 | 3.46E-08 | 2.05E-05 | 4.02E-06 | 0.00014  | 3.24E-05 |
| X0acS1phR3me1K5unK8unK12unK16ack20me2 | 3.13E-07 | 0        | 4.48E-06 | 5.94E-06 | 1.77E-06 | 1.45E-05 | 7.23E-08 | 0        | 1.02E-05 | 6.86E-06 | 2.46E-06 | 1.98E-06 |
| X0unS1unR3unK5ack8unK12ack16ack20me2  | 1.37E-07 | 1.61E-05 | 1.54E-06 | 1.47E-06 | 1.02E-06 | 5.78E-06 | 1.3E-07  | 2.37E-05 | 3.04E-06 | 7.72E-07 | 7.18E-07 | 3.91E-06 |
| X0acS1unR3unK5unK8unK12unK16ack20me3  | 8.81E-05 | 0.000119 | 0.000266 | 0.002353 | 0.000415 | 2.2E-05  | 5.96E-05 | 3E-05    | 0.000106 | 0.000698 | 0.0005   | 1.66E-05 |
| X0acS1unR3unK5ack8ack12ack16ack20un   | 5.88E-06 | 3.37E-05 | 6.85E-06 | 1.86E-05 | 8.25E-06 | 8.77E-06 | 2.79E-06 | 2.15E-05 | 4.92E-06 | 4.67E-06 | 1.41E-05 | 2.09E-06 |
| X0unS1unR3me1K5unK8ack12unK16unK20me2 | 6.13E-07 | 0        | 9.5E-08  | 1.95E-06 | 9E-08    | 5.08E-06 | 9.85E-07 | 0        | 1.58E-07 | 2.32E-06 | 1.65E-07 | 5.66E-06 |
| X0acS1unR3me1K5ack8ack12unK16unK20me1 | 9.33E-08 | 2.58E-06 | 1.1E-07  | 1.7E-05  | 1.83E-07 | 8.59E-06 | 6.66E-08 | 1.24E-06 | 1.26E-07 | 9.44E-06 | 1.73E-07 | 2.61E-06 |
| X0acS1unR3unK5unK8ack12ack16unK20me3  | 9.67E-08 | 2.2E-07  | 7.07E-07 | 2.8E-05  | 1.58E-07 | 5.42E-06 | 5.86E-08 | 3.81E-07 | 1.32E-06 | 2.93E-05 | 1.53E-07 | 4.9E-06  |
| X0acS1phR3unK5unK8unK12unK16unK20me1  | 2.83E-06 | 4.28E-06 | 4.1E-06  | 3.25E-08 | 0.000135 | 0.000136 | 4.81E-06 | 5.51E-06 | 5.77E-06 | 6.5E-08  | 9.5E-05  | 0.00014  |
| X0acS1unR3me1K5unK8ack12ack16ack20me2 | 6.39E-06 | 4.16E-05 | 1.8E-05  | 1.9E-05  | 6.13E-06 | 8.02E-06 | 1.23E-06 | 2.66E-05 | 1.55E-05 | 1.67E-05 | 4.4E-06  | 6.43E-06 |
| X0acS1unR3unK5ack8ack12ack16ack20me2  | 0        | 1.5E-05  | 4.64E-06 | 1.56E-05 | 4E-08    | 2.99E-06 | 0        | 1.26E-05 | 1.08E-05 | 6.8E-06  | 8.41E-08 | 3.21E-06 |
| X0acS1unR3me1K5ack8ack12unK16ack20me2 | 5.93E-07 | 1.15E-05 | 4.04E-06 | 2.43E-05 | 4.39E-06 | 9.09E-06 | 4.31E-07 | 6.46E-06 | 6.71E-06 | 9.09E-06 | 4.26E-06 | 2.45E-06 |
| X0acS1unR3me1K5ack8unK12ack16unK20un  | 0        | 5.33E-08 | 5E-09    | 9.48E-06 | 3.33E-09 | 1.35E-06 | 0        | 9.24E-08 | 1.22E-08 | 1.9E-05  | 8.16E-09 | 2.7E-06  |

|                                       |          |          |          |          |          |          |          |          |          |          |          |          |
|---------------------------------------|----------|----------|----------|----------|----------|----------|----------|----------|----------|----------|----------|----------|
| X0unS1unR3unK5ack8unK12unK16unK20me2  | 2.17E-07 | 1.23E-05 | 6.2E-07  | 1.12E-05 | 5E-09    | 1.7E-05  | 3.75E-07 | 6.23E-06 | 1.26E-06 | 7.63E-06 | 1.22E-08 | 1.35E-05 |
| X0unS1unR3unK5ack8ack12ack16ack20me3  | 1.37E-07 | 0        | 4.42E-07 | 8.75E-08 | 9.65E-07 | 3.06E-06 | 9.61E-08 | 0        | 3.34E-07 | 1.75E-07 | 1.03E-06 | 3.75E-06 |
| X0acS1unR3unK5ack8ack12ack16ack20un   | 4.49E-05 | 6.02E-05 | 0.000236 | 2.63E-05 | 7.47E-06 | 5.1E-06  | 5.94E-06 | 1.09E-05 | 0.00016  | 1.02E-05 | 9.21E-06 | 1.16E-06 |
| X0acS1phR3me1K5unK8unK12ack16unK20me2 | 6.74E-06 | 0        | 1.93E-07 | 2.15E-05 | 8.09E-06 | 3.23E-06 | 5.96E-06 | 0        | 3.01E-07 | 1.47E-05 | 6.15E-06 | 2.75E-06 |
| X0acS1phR3me1K5unK8unK12unK16unK20me2 | 3.13E-07 | 6.94E-06 | 2.33E-07 | 0        | 7.83E-08 | 1.46E-06 | 1.82E-07 | 6.36E-06 | 2.22E-07 | 0        | 1.13E-07 | 1.5E-06  |
| X0unS1unR3unK5unK8ack12ack16unK20me2  | 0        | 8.26E-06 | 4.1E-07  | 0        | 3.83E-08 | 5.56E-06 | 0        | 1.41E-05 | 1E-06    | 0        | 6.59E-08 | 5.52E-06 |
| X0unS1unR3me1K5unK8unK12ack16ack20me3 | 1.83E-06 | 3.98E-06 | 2.15E-07 | 2.97E-06 | 1.16E-05 | 7.58E-07 | 3.07E-06 | 6.83E-06 | 2.55E-07 | 5.94E-06 | 8.04E-06 | 1.32E-06 |
| X0unS1phR3unK5unK8unK12unK16unK20me2  | 2.25E-06 | 3.32E-06 | 6.66E-06 | 6.1E-06  | 2.01E-06 | 6.6E-06  | 1.96E-06 | 1.43E-06 | 3.98E-06 | 1.6E-06  | 3.34E-06 | 4.41E-06 |
| X0unS1phR3unK5ack8unK12unK16unK20me1  | 0        | 2.23E-05 | 7.52E-07 | 6.58E-06 | 3.35E-06 | 5.22E-06 | 0        | 5.76E-06 | 1.18E-06 | 3.52E-06 | 6.19E-06 | 3.51E-06 |
| X0unS1unR3unK5unK8ack12ack16ack20me3  | 1.63E-07 | 6.8E-07  | 8.15E-07 | 5.75E-06 | 9.43E-07 | 4.22E-06 | 1.1E-07  | 7.28E-07 | 1.26E-06 | 6.14E-06 | 1.41E-06 | 4.97E-06 |
| X0unS1phR3unK5unK8ack12unK16ack20me2  | 8.59E-06 | 1.88E-06 | 3.33E-06 | 1.63E-06 | 1.76E-05 | 8.38E-07 | 1.31E-05 | 2.86E-06 | 5.75E-06 | 1.96E-06 | 4.31E-05 | 1.04E-06 |
| X0acS1unR3unK5ack8ack12ack16unK20un   | 1.74E-05 | 3.13E-05 | 1.76E-05 | 1.08E-05 | 2.44E-06 | 2.62E-06 | 2.92E-05 | 6.36E-07 | 2.75E-05 | 1.26E-05 | 2.47E-06 | 1.47E-06 |
| X0unS1unR3me1K5unK8unK12ack16unK20me2 | 0        | 6.87E-07 | 1.85E-07 | 0        | 8.33E-09 | 9.98E-07 | 0        | 5.95E-07 | 3.51E-07 | 0        | 2.04E-08 | 1.02E-06 |
| X0acS1phR3unK5ack8ack12unK16unK20me3  | 0        | 1.53E-05 | 1.67E-09 | 0.000277 | 5E-09    | 4.8E-07  | 0        | 2.32E-05 | 4.08E-09 | 0.000186 | 1.22E-08 | 9.6E-07  |
| X0unS1unR3me1K5unK8unK12unK16unK20un  | 0        | 5.39E-06 | 1.33E-07 | 1.17E-05 | 1.19E-06 | 3.78E-06 | 0        | 1.15E-06 | 1.16E-07 | 1.24E-05 | 2.76E-06 | 2.92E-06 |
| X0unS1phR3unK5unK8unK12unK16unK20me1  | 1.33E-08 | 0        | 1.77E-07 | 0        | 6.28E-07 | 4.1E-07  | 5.77E-09 | 0        | 2.54E-07 | 0        | 1.51E-06 | 8.2E-07  |
| X0unS1phR3unK5unK8unK12unK16unK20un   | 0.000172 | 5.04E-06 | 0.00011  | 2.22E-06 | 2.33E-08 | 5.68E-07 | 0.000297 | 4.21E-07 | 0.000172 | 2.6E-06  | 3.83E-08 | 7.74E-07 |
| X0acS1unR3unK5ack8ack12ack16unK20me1  | 2.61E-06 | 1.54E-05 | 5.92E-06 | 1.12E-05 | 2.37E-05 | 6.73E-07 | 2.26E-06 | 1.13E-05 | 1.39E-05 | 7.1E-06  | 2.26E-05 | 5.67E-07 |
| X0acS1unR3unK5ack8ack12ack16ack20me1  | 3.16E-06 | 3.19E-05 | 2.25E-06 | 7.06E-06 | 4.52E-06 | 5.25E-05 | 4.81E-06 | 2.53E-05 | 2.79E-06 | 7.02E-06 | 9.12E-06 | 4.63E-05 |
| X0unS1phR3unK5unK8unK12unK16ack20me2  | 7.1E-07  | 0.0003   | 2.52E-06 | 3.02E-06 | 1.74E-06 | 6.19E-06 | 1.23E-06 | 5.08E-05 | 1.9E-06  | 1.54E-06 | 2.11E-06 | 7.01E-06 |
| X0acS1unR3me1K5ack8ack12ack16ack20un  | 2.67E-08 | 1.85E-06 | 6.75E-07 | 4.35E-07 | 1.42E-07 | 5.13E-07 | 4.62E-08 | 1.65E-06 | 1.21E-06 | 5.35E-07 | 3.47E-07 | 4.12E-07 |
| X0acS1unR3unK5unK8ack12ack16ack20me3  | 1.08E-06 | 2.45E-06 | 1.12E-05 | 5.08E-05 | 3.76E-06 | 6.68E-06 | 1.13E-06 | 2.11E-06 | 4.31E-06 | 2.03E-05 | 2.22E-06 | 5.01E-06 |
| X0unS1phR3me1K5unK8unK12ack16ack20me2 | 1.26E-06 | 0        | 1.16E-06 | 1.05E-06 | 1.9E-06  | 1.2E-06  | 1.06E-07 | 0        | 1.01E-06 | 1.21E-06 | 1.7E-06  | 3.42E-07 |
| X0acS1phR3me1K5unK8unK12ack16ack20un  | 1.73E-07 | 0        | 3E-08    | 5.58E-07 | 1.67E-07 | 2.43E-07 | 1.42E-07 | 0        | 2.97E-08 | 1.11E-06 | 1.56E-07 | 4.39E-07 |
| X0unS1unR3unK5ack8unK12ack16ack20me3  | 1.83E-07 | 7.03E-07 | 7.72E-07 | 2.53E-05 | 3.4E-06  | 6.41E-06 | 1.88E-07 | 5.8E-07  | 1.01E-06 | 3.62E-05 | 6.49E-06 | 1.03E-05 |
| X0unS1unR3me1K5unK8unK12unK16ack20me2 | 3.33E-09 | 4.37E-07 | 2.07E-07 | 1.88E-06 | 4.07E-06 | 1.1E-06  | 5.77E-09 | 2.31E-07 | 4.11E-07 | 1.16E-06 | 5.59E-06 | 6.13E-07 |
| X0acS1unR3me1K5ack8ack12unK16ack20me3 | 0        | 4.73E-06 | 1.72E-07 | 2.65E-07 | 1.98E-07 | 5.2E-07  | 0        | 3.59E-06 | 2.55E-07 | 4.97E-07 | 3.82E-07 | 4.76E-07 |
| X0unS1unR3unK5unK8unK12ack16ack20me2  | 5.33E-08 | 2.02E-06 | 6.86E-05 | 1.44E-06 | 5.32E-07 | 2.41E-06 | 9.24E-08 | 1.95E-06 | 8.57E-05 | 1.37E-06 | 8.9E-07  | 2.78E-06 |
| X0unS1unR3unK5ack8unK12unK16ack20me1  | 4.2E-07  | 8.53E-07 | 1.73E-06 | 1E-08    | 1.32E-06 | 1.34E-06 | 7.27E-07 | 1.42E-06 | 2.74E-06 | 1.41E-08 | 3.24E-06 | 2.22E-06 |
| X0acS1phR3unK5unK8ack12ack16unK20me2  | 0        | 0        | 0        | 2.5E-08  | 0        | 1.7E-07  | 0        | 0        | 0        | 4.36E-08 | 0        | 3.33E-07 |
| X0unS1unR3unK5ack8unK12unK16ack20me3  | 0        | 7.73E-07 | 5E-09    | 9.52E-06 | 0        | 2.02E-05 | 0        | 3.4E-07  | 1.22E-08 | 1.82E-05 | 0        | 3.97E-05 |
| X0unS1unR3unK5ack8ack12ack16unK20me3  | 2.17E-07 | 7E-07    | 3.77E-07 | 2.68E-07 | 1.18E-07 | 1.68E-06 | 2.45E-07 | 6.56E-07 | 4.29E-07 | 4.53E-07 | 1.18E-07 | 7.42E-07 |
| X0unS1unR3me1K5ack8unK12unK16unK20me1 | 0        | 4.67E-08 | 0        | 3.35E-07 | 0        | 5.45E-07 | 0        | 4.51E-08 | 0        | 2.8E-07  | 0        | 4.65E-07 |
| X0unS1unR3unK5ack8ack12unK16ack20me2  | 2.33E-08 | 3.4E-05  | 1.78E-07 | 4.68E-07 | 4.13E-07 | 1.22E-06 | 2.52E-08 | 5.36E-05 | 2.71E-07 | 5.1E-07  | 6.55E-07 | 1.86E-06 |
| X0unS1unR3me1K5ack8unK12ack16ack20me1 | 3.03E-07 | 4.93E-07 | 6.4E-07  | 0        | 2.32E-07 | 1.9E-07  | 2.22E-07 | 8.54E-07 | 3.06E-07 | 0        | 1.66E-07 | 1.74E-07 |
| X0unS1unR3unK5ack8unK12unK16unK20un   | 1.67E-08 | 2.47E-07 | 4.13E-07 | 2.17E-06 | 5.17E-08 | 7.23E-07 | 2.89E-08 | 1.58E-07 | 9.16E-07 | 3.05E-06 | 6.34E-08 | 9.63E-07 |
| X0unS1unR3unK5ack8unK12unK16unK20me1  | 0        | 2.57E-06 | 2.25E-05 | 8E-07    | 2.78E-07 | 2.79E-06 | 0        | 1.4E-06  | 5.12E-05 | 4.18E-07 | 6.38E-07 | 4.43E-06 |
| X0acS1unR3unK5ack8ack12unK16ack20me1  | 4.32E-05 | 3.34E-05 | 0.000144 | 1.1E-05  | 5.6E-05  | 1.26E-06 | 7.25E-06 | 1.57E-06 | 9.93E-05 | 5.76E-06 | 4.48E-05 | 1.19E-06 |
| X0acS1unR3me1K5ack8ack12ack16unK20me2 | 1.49E-05 | 9.33E-08 | 1.5E-05  | 2.5E-08  | 1.29E-05 | 3.33E-07 | 7.6E-06  | 1.18E-07 | 6.83E-06 | 2.65E-08 | 5.9E-06  | 2.76E-07 |
| X0unS1unR3me1K5ack8ack12ack16unK20me3 | 1.67E-08 | 0        | 4.67E-08 | 0        | 4.5E-08  | 1.55E-07 | 2.89E-08 | 0        | 3.14E-08 | 0        | 4.32E-08 | 1.84E-07 |
| X0acS1phR3unK5ack8unK12ack16ack20un   | 0        | 2.66E-05 | 5.2E-07  | 1.52E-05 | 1.03E-06 | 1.09E-06 | 0        | 2.1E-05  | 7.66E-07 | 1.47E-05 | 2.53E-06 | 1.95E-06 |
| X0unS1unR3me1K5ack8ack12unK16ack20me2 | 1.93E-07 | 1.5E-07  | 6.39E-06 | 2.25E-07 | 3.77E-07 | 2.13E-07 | 1.6E-07  | 1.8E-07  | 1.43E-05 | 2.77E-07 | 5.24E-07 | 1.38E-07 |
| X0unS1phR3unK5unK8ack12ack16unK20me1  | 8.67E-08 | 1.85E-06 | 1.02E-07 | 4E-08    | 2.35E-07 | 6.5E-08  | 5.51E-08 | 1.61E-06 | 8.77E-08 | 6.68E-08 | 9.63E-08 | 1.11E-07 |
| X0unS1unR3unK5ack8unK12ack16unK20me2  | 0        | 1.47E-06 | 1E-08    | 7.03E-07 | 3.67E-08 | 1.15E-06 | 0        | 2.51E-06 | 2.45E-08 | 1.3E-06  | 6.83E-08 | 1.87E-06 |

|                                       |          |          |          |          |          |          |          |          |          |          |          |          |
|---------------------------------------|----------|----------|----------|----------|----------|----------|----------|----------|----------|----------|----------|----------|
| X0unS1unR3me1K5unK8ack12ack16ack20me1 | 1.57E-06 | 4.33E-08 | 2.48E-06 | 1.18E-07 | 1.32E-06 | 2.05E-07 | 1.17E-06 | 6.66E-08 | 1.45E-06 | 1.31E-07 | 1.26E-06 | 8.7E-08  |
| X0unS1unR3unK5unK8unK12unK16ack20me1  | 1.95E-06 | 1.23E-05 | 5.5E-07  | 0        | 1.25E-06 | 5.5E-08  | 3.18E-06 | 1.64E-05 | 8.73E-07 | 0        | 1.96E-06 | 1.1E-07  |
| X0acS1phR3me1K5ack8unK12unK16unK20me2 | 7.83E-07 | 6.67E-09 | 9E-07    | 2.5E-09  | 1.34E-06 | 4.93E-07 | 1.46E-07 | 1.15E-08 | 6.87E-07 | 5E-09    | 8.15E-07 | 5.4E-07  |
| X0unS1unR3unK5unK8unK12unK16unK20un   | 0.00014  | 0.000117 | 0.002932 | 7.92E-05 | 0.00017  | 1.08E-05 | 0.000242 | 1.19E-05 | 0.004555 | 3.47E-05 | 0.00013  | 1.6E-05  |
| X0unS1phR3unK5ack8unK12ack16ack20me2  | 0        | 0        | 0        | 6.55E-07 | 1.67E-09 | 4.75E-08 | 0        | 0        | 0        | 1.1E-06  | 4.08E-09 | 9.5E-08  |
| X0unS1unR3unK5unK8ack12ack16unK20me1  | 0        | 2.4E-07  | 1.67E-07 | 9.13E-07 | 0        | 2.03E-07 | 0        | 4.16E-07 | 4.08E-07 | 1.83E-06 | 0        | 1.36E-07 |
| X0acS1unR3me1K5ack8ack12unK16unK20me2 | 2.37E-07 | 0        | 1.88E-07 | 2.28E-07 | 2.13E-07 | 2.25E-08 | 1.53E-07 | 0        | 2.01E-07 | 4.55E-07 | 1.38E-07 | 4.5E-08  |
| X0unS1phR3me1K5unK8unK12ack16ack20me3 | 5.03E-07 | 6.67E-08 | 3.02E-07 | 3.5E-08  | 2.07E-06 | 2.33E-07 | 5.08E-07 | 1.15E-07 | 3.25E-07 | 7E-08    | 1.62E-06 | 3.73E-07 |
| X0unS1unR3me1K5ack8unK12ack16ack20me3 | 3.33E-08 | 0        | 3.33E-08 | 1E-08    | 6.55E-07 | 3E-08    | 2.08E-08 | 0        | 3.39E-08 | 2E-08    | 1.06E-06 | 2.58E-08 |
| X0unS1unR3unK5unK8unK12unK16ack20un   | 0        | 4.6E-07  | 1.1E-06  | 3.9E-06  | 4.17E-08 | 1.03E-07 | 0        | 5.79E-07 | 1.71E-06 | 6.07E-06 | 7.17E-08 | 9.81E-08 |
| X0acS1unR3me1K5unK8ack12unK16ack20me1 | 3.33E-09 | 2E-07    | 2.33E-08 | 5E-09    | 4.83E-08 | 5E-08    | 5.77E-09 | 3.46E-07 | 3.01E-08 | 1E-08    | 4.58E-08 | 3.56E-08 |
| X0unS1phR3me1K5unK8unK12unK16ack20me1 | 0        | 4.79E-06 | 1.67E-09 | 4.75E-08 | 3.83E-08 | 3E-08    | 0        | 4.21E-06 | 4.08E-09 | 9.5E-08  | 4.49E-08 | 1.63E-08 |
| X0unS1phR3unK5ack8unK12ack16ack20me3  | 0        | 0        | 0        | 0        | 2.5E-08  | 2.5E-08  | 0        | 0        | 0        | 0        | 3.99E-08 | 1.73E-08 |
| X0acS1unR3me1K5ack8ack12ack16ack20me2 | 6.33E-08 | 2.2E-05  | 1.03E-06 | 8.62E-06 | 2.98E-07 | 2.84E-06 | 6.03E-08 | 2.95E-06 | 2.36E-06 | 3.84E-06 | 3.41E-07 | 2.87E-06 |
| X0unS1unR3me1K5unK8unK12unK16unK20me1 | 1.74E-05 | 1.29E-06 | 1.85E-05 | 9.25E-08 | 3.88E-05 | 7.5E-09  | 4.96E-06 | 4.5E-07  | 6.3E-06  | 1.85E-07 | 1.87E-05 | 1.5E-08  |
| X0unS1unR3me1K5ack8ack12ack16ack20un  | 6.67E-09 | 0        | 1.17E-08 | 4.5E-08  | 9.17E-08 | 1.75E-08 | 5.77E-09 | 0        | 2.4E-08  | 7.72E-08 | 1.91E-07 | 2.36E-08 |
| X0unS1phR3unK5ack8unK12unK16ack20me2  | 2.9E-07  | 0        | 2.78E-07 | 5E-09    | 3.68E-07 | 1E-08    | 5.02E-07 | 0        | 6.29E-07 | 5.77E-09 | 9.02E-07 | 8.16E-09 |
| X0unS1unR3unK5unK8ack12ack16unK20me3  | 0        | 7.28E-05 | 0        | 0        | 0        | 5E-09    | 0        | 6.87E-05 | 0        | 0        | 0        | 1E-08    |
| X0unS1phR3unK5unK8ack12ack16ack20me2  | 0        | 1E-08    | 0        | 7.5E-09  | 0        | 2.5E-08  | 0        | 1E-08    | 0        | 9.57E-09 | 0        | 1.73E-08 |
| X0acS1unR3me1K5ack8unK12ack16ack20un  | 6.67E-09 | 0        | 2.83E-08 | 7.5E-09  | 2.33E-08 | 2.5E-09  | 5.77E-09 | 0        | 4.17E-08 | 1.5E-08  | 4.41E-08 | 5E-09    |
| X0acS1phR3unK5unK8unK12ack16ack20me1  | 1.58E-06 | 2.67E-08 | 4.47E-07 | 7.5E-09  | 7.07E-07 | 1.8E-07  | 2.06E-06 | 3.06E-08 | 3.96E-07 | 9.57E-09 | 5.44E-07 | 3.27E-07 |
| X0unS1phR3unK5unK8ack12ack16ack20me1  | 7.5E-07  | 0        | 5.22E-07 | 0        | 8.18E-07 | 9.4E-07  | 7.2E-07  | 0        | 4.55E-07 | 0        | 7.66E-07 | 1.87E-06 |
| X0acS1phR3unK5unK8ack12ack16unK20me1  | 3.28E-06 | 0        | 8.9E-07  | 0        | 3.12E-07 | 3.6E-07  | 3.16E-06 | 0        | 7.03E-07 | 0        | 4.71E-07 | 7.13E-07 |
| X0acS1phR3unK5ack8unK12unK16ack20me2  | 0        | 0        | 0        | 4.49E-06 | 2.08E-07 | 2.5E-09  | 0        | 0        | 0        | 8.99E-06 | 5.1E-07  | 5E-09    |
| X0unS1unR3unK5unK8unK12ack16unK20me2  | 0        | 0        | 5.17E-08 | 3.81E-06 | 2.1E-07  | 2.34E-06 | 0        | 0        | 1.22E-07 | 3.08E-06 | 3.49E-07 | 4.67E-06 |
| X0acS1phR3me1K5ack8ack12unK16unK20me2 | 0        | 1.63E-05 | 5.05E-07 | 6.92E-06 | 5.6E-07  | 2.03E-05 | 0        | 2.58E-05 | 8.18E-07 | 8.33E-06 | 7.65E-07 | 4.05E-05 |
| X0unS1unR3unK5ack8ack12unK16ack20me1  | 0        | 0        | 0        | 0        | 0        | 2.75E-08 | 0        | 0        | 0        | 0        | 0        | 3.2E-08  |
| X0unS1phR3me1K5ack8ack12ack16unK20un  | 0        | 0        | 5E-09    | 0        | 5E-09    | 1.25E-08 | 0        | 0        | 8.37E-09 | 0        | 8.37E-09 | 1.5E-08  |
| X0unS1phR3unK5unK8unK12ack16ack20me2  | 0        | 0        | 1.67E-08 | 5E-09    | 0        | 0        | 0        | 0        | 4.08E-08 | 1E-08    | 0        | 0        |
| X0unS1unR3unK5ack8ack12unK16unK20un   | 0        | 0        | 2E-08    | 0        | 0        | 0        | 0        | 0        | 4.9E-08  | 0        | 0        | 0        |
| X0acS1unR3me1K5unK8ack12unK16unK20un  | 0        | 0        | 0        | 0        | 2E-08    | 0        | 0        | 0        | 0        | 0        | 4.9E-08  | 0        |
| X0acS1phR3unK5ack8unK12ack16ack20me1  | 3.33E-09 | 0        | 1.83E-08 | 0        | 0        | 0        | 5.77E-09 | 0        | 2.99E-08 | 0        | 0        | 0        |
| X0unS1phR3me1K5unK8unK12ack16unK20me1 | 0        | 0        | 0        | 0        | 2.17E-08 | 0        | 0        | 0        | 0        | 0        | 2.56E-08 | 0        |
| X0unS1phR3me1K5ack8ack12unK16ack20me2 | 0        | 0        | 0        | 3.25E-08 | 0        | 0        | 0        | 0        | 0        | 6.5E-08  | 0        | 0        |
| X0unS1unR3me1K5ack8ack12ack16unK20un  | 0        | 4E-08    | 0        | 0        | 1.67E-09 | 0        | 0        | 6.93E-08 | 0        | 0        | 4.08E-09 | 0        |
| X0unS1unR3me1K5unK8ack12ack16ack20un  | 0        | 0        | 1.67E-09 | 0        | 2E-08    | 0        | 0        | 0        | 4.08E-09 | 0        | 4.43E-08 | 0        |
| X0unS1phR3unK5ack8ack12unK16ack20me1  | 6.67E-09 | 0        | 3.33E-09 | 0        | 1.67E-08 | 0        | 1.15E-08 | 0        | 5.16E-09 | 0        | 3.61E-08 | 0        |
| X0unS1unR3unK5unK8ack12unK16unK20me2  | 0        | 0        | 2E-08    | 0        | 8.33E-09 | 0        | 0        | 0        | 4.43E-08 | 0        | 1.6E-08  | 0        |
| X0unS1unR3me1K5unK8unK12ack16ack20un  | 0        | 2.67E-08 | 0        | 0        | 0        | 2.5E-08  | 0        | 4.62E-08 | 0        | 0        | 0        | 5E-08    |
| X0unS1phR3unK5ack8unK12ack16ack20un   | 4E-08    | 0        | 1E-08    | 0        | 1.67E-09 | 0        | 6.93E-08 | 0        | 1.67E-08 | 0        | 4.08E-09 | 0        |
| X0acS1phR3me1K5unK8unK12ack16ack20me1 | 0        | 0        | 0        | 4.5E-08  | 1.67E-09 | 0        | 0        | 0        | 0        | 9E-08    | 4.08E-09 | 0        |
| X0unS1unR3me1K5ack8ack12unK16unK20me3 | 6E-08    | 0        | 1.67E-09 | 0        | 1.67E-09 | 0        | 1.04E-07 | 0        | 4.08E-09 | 0        | 4.08E-09 | 0        |
| X0unS1unR3me1K5ack8ack12unK16ack20me3 | 6.67E-09 | 0        | 2.17E-08 | 5E-09    | 8.33E-09 | 0        | 1.15E-08 | 0        | 3.87E-08 | 1E-08    | 1.6E-08  | 0        |
| X0acS1unR3me1K5ack8unK12unK16unK20me1 | 0        | 0        | 2.67E-08 | 0        | 1E-08    | 0        | 0        | 0        | 6.53E-08 | 0        | 2.45E-08 | 0        |



|                                       |          |          |          |          |          |          |          |          |          |          |          |          |
|---------------------------------------|----------|----------|----------|----------|----------|----------|----------|----------|----------|----------|----------|----------|
| X0unS1phR3me1K5ack8ack12unK16unK20me1 | 0        | 0        | 1.67E-09 | 2.5E-08  | 8.33E-09 | 1.75E-08 | 0        | 0        | 4.08E-09 | 5E-08    | 2.04E-08 | 2.87E-08 |
| X0unS1unR3me1K5ack8ack12ack16unK20me1 | 1.67E-08 | 0        | 8.33E-09 | 2.5E-08  | 6.67E-09 | 0        | 2.89E-08 | 0        | 9.83E-09 | 5E-08    | 1.03E-08 | 0        |
| X0acS1phR3me1K5unK8ack12ack16unK20me1 | 0        | 0        | 4E-08    | 0        | 0        | 0        | 0        | 0        | 9.8E-08  | 0        | 0        | 0        |
| X0acS1unR3me1K5unK8ack12unK16unK20me3 | 0        | 6.67E-09 | 2.5E-08  | 0        | 1.17E-08 | 0        | 0        | 1.15E-08 | 4.46E-08 | 0        | 2.86E-08 | 0        |
| X0unS1phR3unK5unK8ack12unK16ack20me3  | 2E-08    | 0        | 2.17E-08 | 0        | 8.33E-09 | 0        | 2E-08    | 0        | 2.64E-08 | 0        | 1.17E-08 | 0        |
| X0acS1unR3me1K5unK8ack12unK16ack20un  | 0        | 0        | 0        | 4.25E-08 | 5E-09    | 1.25E-08 | 0        | 0        | 0        | 6.65E-08 | 1.22E-08 | 2.5E-08  |
| X0acS1unR3me1K5ack8unK12unK16unK20un  | 0        | 8.33E-08 | 0        | 0        | 0        | 0        | 0        | 1.44E-07 | 0        | 0        | 0        | 0        |
| X0unS1unR3unK5ack8unK12ack16unK20me3  | 0        | 0        | 5E-09    | 0        | 3.67E-08 | 0        | 0        | 0        | 5.48E-09 | 0        | 7.61E-08 | 0        |
| X0unS1unR3unK5unK8unK12ack16unK20me3  | 0        | 0        | 5.33E-08 | 0        | 0        | 0        | 0        | 0        | 1.31E-07 | 0        | 0        | 0        |
| X0unS1phR3me1K5unK8ack12ack16unK20me1 | 4E-08    | 3.33E-09 | 3.33E-08 | 0        | 0        | 0        | 6.08E-08 | 5.77E-09 | 8.16E-08 | 0        | 0        | 0        |
| X0acS1unR3me1K5ack8unK12ack16unK20me1 | 1.33E-08 | 0        | 1.67E-08 | 0        | 3.17E-08 | 0        | 5.77E-09 | 0        | 1.37E-08 | 0        | 5.85E-08 | 0        |
| X0acS1unR3me1K5unK8ack12ack16unK20un  | 0        | 1.1E-07  | 1.67E-09 | 0        | 0        | 0        | 0        | 1.91E-07 | 4.08E-09 | 0        | 0        | 0        |
| X0acS1phR3me1K5unK8unK12unK16ack20me1 | 0        | 0        | 0        | 9.25E-08 | 0        | 0        | 0        | 0        | 0        | 1.85E-07 | 0        | 0        |
| X0unS1phR3unK5unK8ack12ack16unK20me3  | 2.33E-08 | 0        | 1.17E-08 | 0        | 4.17E-08 | 0        | 2.08E-08 | 0        | 1.47E-08 | 0        | 6.27E-08 | 0        |
| X0acS1unR3me1K5ack8unK12ack16unK20me3 | 1E-08    | 0        | 2.83E-08 | 0        | 3.33E-08 | 0        | 1E-08    | 0        | 3.31E-08 | 0        | 3.83E-08 | 0        |
| X0unS1unR3unK5ack8ack12ack16ack20me2  | 0        | 0        | 0        | 1.05E-07 | 0        | 2.5E-09  | 0        | 0        | 0        | 2.1E-07  | 0        | 5E-09    |
| X0unS1unR3me1K5ack8ack12unK16unK20un  | 0        | 0        | 3.33E-09 | 0        | 7.5E-08  | 0        | 0        | 0        | 5.16E-09 | 0        | 1.84E-07 | 0        |
| X0unS1unR3me1K5ack8ack12unK16ack20me1 | 1E-08    | 0        | 1.33E-08 | 0        | 4.33E-08 | 2.75E-08 | 1.73E-08 | 0        | 2.34E-08 | 0        | 5.99E-08 | 5.5E-08  |
| X0unS1phR3unK5unK8ack12ack16ack20un   | 0        | 0        | 4.67E-08 | 3.5E-08  | 1.17E-08 | 0        | 0        | 0        | 6.59E-08 | 7E-08    | 1.47E-08 | 0        |
| X0acS1unR3me1K5ack8ack12unK16ack20un  | 3.33E-09 | 0        | 2.17E-08 | 1E-08    | 5.67E-08 | 0        | 5.77E-09 | 0        | 1.94E-08 | 2E-08    | 6.02E-08 | 0        |
| X0unS1phR3me1K5unK8unK12unK16unK20me3 | 0        | 0        | 3.33E-08 | 0        | 5.33E-08 | 0        | 0        | 0        | 3.78E-08 | 0        | 9.24E-08 | 0        |
| X0unS1phR3me1K5unK8ack12unK16ack20un  | 0        | 1.73E-07 | 0        | 0        | 1.67E-09 | 0        | 0        | 3E-07    | 0        | 0        | 4.08E-09 | 0        |
| X0unS1phR3unK5ack8ack12ack16unK20me2  | 3.33E-09 | 0        | 0        | 0        | 1.67E-09 | 1.38E-07 | 5.77E-09 | 0        | 0        | 0        | 4.08E-09 | 2.75E-07 |
| X0unS1phR3unK5ack8ack12unK16ack20un   | 4.33E-08 | 0        | 4.5E-08  | 0        | 2.83E-08 | 0        | 2.52E-08 | 0        | 2.07E-08 | 0        | 5.49E-08 | 0        |
| X0unS1unR3unK5unK8ack12ack16unK20un   | 0        | 0        | 9.5E-08  | 0        | 0        | 0        | 0        | 0        | 2.28E-07 | 0        | 0        | 0        |
| X0acS1unR3me1K5unK8ack12ack16ack20un  | 6.67E-09 | 0        | 1.67E-08 | 0        | 1.33E-08 | 1E-07    | 1.15E-08 | 0        | 1.97E-08 | 0        | 3.27E-08 | 1.62E-07 |
| X0acS1phR3unK5ack8ack12ack16unK20me1  | 0        | 0        | 9E-08    | 0        | 3.33E-09 | 1.25E-08 | 0        | 0        | 1.56E-07 | 0        | 5.16E-09 | 2.5E-08  |
| X0unS1phR3me1K5ack8unK12ack16unK20un  | 4E-08    | 3.33E-09 | 1E-08    | 1.25E-08 | 6.5E-08  | 0        | 2E-08    | 5.77E-09 | 1.67E-08 | 2.5E-08  | 6.35E-08 | 0        |
| X0unS1unR3unK5ack8ack12ack16unK20me1  | 0        | 0        | 0        | 1.63E-07 | 0        | 0        | 0        | 0        | 0        | 3.25E-07 | 0        | 0        |
| X0unS1unR3unK5ack8unK12ack16ack20un   | 3.33E-09 | 2.1E-07  | 0        | 0        | 1.67E-09 | 0        | 5.77E-09 | 3.64E-07 | 0        | 0        | 4.08E-09 | 0        |
| X0unS1unR3unK5unK8ack12unK16unK20me3  | 0        | 0        | 1.15E-07 | 0        | 0        | 0        | 0        | 0        | 2.82E-07 | 0        | 0        | 0        |
| X0unS1phR3unK5unK8unK12ack16ack20me3  | 3.33E-08 | 0        | 5.83E-08 | 0        | 3.83E-08 | 2.5E-09  | 2.08E-08 | 0        | 6.65E-08 | 0        | 4.36E-08 | 5E-09    |
| X0unS1unR3me1K5ack8unK12ack16unK20un  | 0        | 1.47E-07 | 5E-09    | 0        | 4E-08    | 0        | 0        | 1.27E-07 | 1.22E-08 | 0        | 9.8E-08  | 0        |
| X0unS1phR3me1K5ack8ack12unK16unK20me3 | 3.67E-08 | 0        | 4.67E-08 | 0        | 5.33E-08 | 0        | 6.35E-08 | 0        | 7.69E-08 | 0        | 7.69E-08 | 0        |
| X0acS1phR3me1K5ack8unK12unK16unK20un  | 8.67E-08 | 0        | 3E-08    | 7.5E-09  | 4.33E-08 | 0        | 4.93E-08 | 0        | 2E-08    | 1.5E-08  | 5.09E-08 | 0        |
| X0unS1phR3unK5ack8unK12ack16unK20me3  | 3.67E-08 | 0        | 3.67E-08 | 0        | 7.67E-08 | 0        | 3.06E-08 | 0        | 3.14E-08 | 0        | 6.25E-08 | 0        |
| X0unS1phR3me1K5ack8unK12ack16unK20me3 | 1.23E-07 | 0        | 5E-09    | 0        | 6.67E-08 | 0        | 1.88E-07 | 0        | 1.22E-08 | 0        | 1.4E-07  | 0        |
| X0unS1unR3unK5ack8ack12unK16unK20me3  | 1.33E-08 | 1.47E-07 | 2.33E-08 | 1.5E-08  | 8.33E-09 | 1.75E-08 | 2.31E-08 | 1.5E-07  | 3.83E-08 | 2.38E-08 | 1.6E-08  | 2.06E-08 |
| X0unS1unR3me1K5ack8unK12unK16ack20me2 | 0        | 2.43E-07 | 3.33E-09 | 0        | 1.17E-08 | 0        | 0        | 4.21E-07 | 8.16E-09 | 0        | 2.86E-08 | 0        |
| X0acS1unR3me1K5unK8ack12ack16unK20me3 | 2E-08    | 0        | 2.17E-08 | 0        | 8.17E-08 | 3.5E-08  | 3.46E-08 | 0        | 1.47E-08 | 0        | 1.1E-07  | 7E-08    |
| X0acS1phR3me1K5unK8unK12ack16unK20un  | 8.67E-08 | 0        | 3.33E-08 | 0        | 6.5E-08  | 0        | 4.51E-08 | 0        | 1.21E-08 | 0        | 6.35E-08 | 0        |
| X0acS1phR3me1K5unK8unK12ack16unK20me3 | 3.33E-08 | 0        | 1.5E-08  | 0        | 1.13E-07 | 0        | 4.16E-08 | 0        | 1.52E-08 | 0        | 9.58E-08 | 0        |
| X0unS1phR3me1K5ack8unK12unK16ack20me2 | 1.67E-08 | 0        | 1.35E-07 | 0        | 3.33E-09 | 0        | 1.53E-08 | 0        | 2.24E-07 | 0        | 5.16E-09 | 0        |
| X0acS1phR3unK5ack8ack12unK16ack20un   | 0        | 0        | 7.33E-08 | 0        | 7.83E-08 | 2.5E-09  | 0        | 0        | 1.8E-07  | 0        | 1.56E-07 | 5E-09    |

|                                       |          |          |          |          |          |          |          |          |          |          |          |          |
|---------------------------------------|----------|----------|----------|----------|----------|----------|----------|----------|----------|----------|----------|----------|
| X0acS1phR3unK5ack8unK12unK16ack20me1  | 0        | 0        | 1.67E-09 | 0        | 1.55E-07 | 0        | 0        | 0        | 4.08E-09 | 0        | 3.75E-07 | 0        |
| X0acS1unR3me1K5unK8unK12ack16unK20un  | 0        | 0        | 0        | 0        | 1.67E-09 | 2.38E-07 | 0        | 0        | 0        | 0        | 4.08E-09 | 4.75E-07 |
| X0acS1phR3me1K5unK8unK12unK16ack20un  | 1E-08    | 0        | 6.67E-09 | 2.15E-07 | 1.5E-08  | 0        | 1.73E-08 | 0        | 8.16E-09 | 2.55E-07 | 1.87E-08 | 0        |
| X0unS1phR3unK5ack8unK12unK16ack20me3  | 1.63E-07 | 0        | 3.5E-08  | 0        | 5.33E-08 | 0        | 1.6E-07  | 0        | 6.66E-08 | 0        | 8.55E-08 | 0        |
| X0acS1unR3me1K5ack8ack12ack16ack20me1 | 3.33E-09 | 1.33E-08 | 0        | 5E-09    | 1.52E-07 | 2.75E-08 | 5.77E-09 | 1.53E-08 | 0        | 1E-08    | 3.19E-07 | 3.2E-08  |
| X0unS1unR3unK5ack8ack12unK16unK20me2  | 1.33E-07 | 1.67E-08 | 0        | 8.25E-08 | 1.33E-08 | 6E-08    | 2.31E-07 | 2.89E-08 | 0        | 1.09E-07 | 2.8E-08  | 8.04E-08 |
| X0acS1unR3me1K5ack8ack12unK16unK20me3 | 5.33E-08 | 0        | 5.67E-08 | 0        | 1.02E-07 | 5E-09    | 6.81E-08 | 0        | 2.94E-08 | 0        | 9.77E-08 | 1E-08    |
| X0unS1phR3unK5unK8ack12unK16unK20me3  | 1.53E-07 | 0        | 8E-08    | 0        | 4.83E-08 | 0        | 1.31E-07 | 0        | 5.76E-08 | 0        | 3.76E-08 | 0        |
| X0unS1phR3unK5unK8ack12unK16ack20un   | 5.67E-08 | 0        | 1.55E-07 | 0        | 2.83E-08 | 0        | 5.03E-08 | 0        | 1.43E-07 | 0        | 2.93E-08 | 0        |
| X0unS1phR3me1K5ack8ack12unK16unK20un  | 7E-08    | 3.67E-08 | 4.83E-08 | 1.25E-08 | 1.03E-07 | 0        | 1.04E-07 | 6.35E-08 | 3.87E-08 | 2.5E-08  | 4.08E-08 | 0        |
| X0unS1unR3unK5ack8ack12unK16ack20me3  | 7.33E-08 | 0        | 7.83E-08 | 8.5E-08  | 4.67E-08 | 0        | 6.35E-08 | 0        | 1.59E-07 | 1.7E-07  | 7.69E-08 | 0        |
| X0unS1phR3me1K5ack8unK12ack16unK20me2 | 1.2E-07  | 0        | 9.5E-08  | 0        | 7.33E-08 | 0        | 1.05E-07 | 0        | 5.68E-08 | 0        | 6.98E-08 | 0        |
| X0unS1unR3me1K5unK8unK12unK16unK20me3 | 6.33E-08 | 0        | 8.33E-09 | 7.5E-09  | 1.3E-07  | 8.75E-08 | 1.1E-07  | 0        | 2.04E-08 | 1.5E-08  | 2E-07    | 1.36E-07 |
| X0unS1phR3me1K5unK8unK12unK16unK20un  | 0        | 4.67E-08 | 0        | 0        | 2.12E-07 | 2.5E-09  | 0        | 5.03E-08 | 0        | 0        | 4.99E-07 | 5E-09    |
| X0acS1phR3me1K5unK8ack12unK16unK20un  | 5.33E-08 | 0        | 8.83E-08 | 8.75E-08 | 7.17E-08 | 0        | 2.31E-08 | 0        | 1.45E-07 | 1.75E-07 | 1E-07    | 0        |
| X0acS1phR3me1K5ack8unK12unK16ack20un  | 6.33E-08 | 0        | 4.17E-08 | 0        | 1.85E-07 | 0        | 9.29E-08 | 0        | 3.66E-08 | 0        | 1.69E-07 | 0        |
| X0unS1unR3unK5ack8unK12ack16ack20me1  | 1.33E-08 | 5.67E-08 | 5.83E-08 | 0        | 1.68E-07 | 0        | 2.31E-08 | 9.81E-08 | 9.93E-08 | 0        | 3.93E-07 | 0        |
| X0acS1unR3me1K5ack8unK12unK16ack20me3 | 2.33E-08 | 0        | 1.37E-07 | 0        | 1.13E-07 | 0        | 3.21E-08 | 0        | 1.43E-07 | 0        | 1.75E-07 | 0        |
| X0unS1phR3me1K5ack8unK12ack16unK20me1 | 0        | 0        | 0        | 0        | 2.73E-07 | 0        | 0        | 0        | 0        | 0        | 5.52E-07 | 0        |
| X0unS1unR3me1K5unK8ack12ack16unK20me2 | 0        | 1.03E-07 | 1.67E-09 | 0        | 3.33E-09 | 3.3E-07  | 0        | 1.79E-07 | 4.08E-09 | 0        | 8.16E-09 | 4.06E-07 |
| X0unS1unR3unK5unK8ack12ack16ack20me2  | 2.03E-07 | 0        | 1.15E-07 | 0        | 1.67E-08 | 7E-08    | 1.02E-07 | 0        | 1.94E-07 | 0        | 2.25E-08 | 1.27E-07 |
| X0acS1unR3unK5ack8ack12ack16ack20me3  | 0        | 8E-08    | 3.83E-08 | 2.93E-07 | 1.67E-09 | 1.75E-08 | 0        | 1.22E-07 | 4.17E-08 | 4.06E-07 | 4.08E-09 | 2.36E-08 |
| X0unS1unR3me1K5ack8unK12ack16unK20me2 | 0        | 0        | 0        | 0        | 0        | 4.38E-07 | 0        | 0        | 0        | 0        | 0        | 8.75E-07 |
| X0unS1phR3unK5ack8ack12ack16unK20un   | 7.33E-08 | 0        | 8.83E-08 | 0        | 1.68E-07 | 0        | 2.52E-08 | 0        | 7.11E-08 | 0        | 3.55E-07 | 0        |
| X0unS1unR3unK5ack8ack12unK16ack20un   | 3.33E-09 | 1.67E-08 | 2.47E-07 | 5.25E-08 | 0        | 5E-09    | 5.77E-09 | 2.89E-08 | 5.75E-07 | 7.54E-08 | 0        | 1E-08    |
| X0unS1phR3unK5ack8unK12ack16unK20me1  | 1.67E-08 | 0        | 4.33E-08 | 0        | 2.48E-07 | 0        | 2.89E-08 | 0        | 5.99E-08 | 0        | 7.08E-08 | 0        |
| X0unS1phR3me1K5ack8ack12unK16unK20me2 | 9.67E-08 | 0        | 9.33E-08 | 7.25E-08 | 1.13E-07 | 0        | 8.96E-08 | 0        | 4.72E-08 | 1.45E-07 | 1.39E-07 | 0        |
| X0acS1phR3me1K5unK8ack12unK16ack20un  | 1.97E-07 | 1.93E-07 | 2.5E-08  | 0        | 8.67E-08 | 0        | 2.21E-07 | 2E-07    | 3.56E-08 | 0        | 9.05E-08 | 0        |
| X0unS1phR3me1K5ack8unK12unK16unK20me3 | 2.4E-07  | 0        | 7.17E-08 | 7.75E-08 | 8.67E-08 | 0        | 2.8E-07  | 0        | 9.35E-08 | 1.55E-07 | 7.87E-08 | 0        |
| X0acS1phR3unK5unK8ack12ack16unK20me3  | 0        | 0        | 0        | 4.93E-07 | 1.33E-08 | 0        | 0        | 0        | 0        | 5.63E-07 | 3.27E-08 | 0        |
| X0unS1phR3me1K5unK8ack12ack16unK20un  | 1.57E-07 | 0        | 8.17E-08 | 0        | 1.93E-07 | 0        | 1.95E-07 | 0        | 3.66E-08 | 0        | 1.09E-07 | 0        |
| X0acS1unR3me1K5unK8ack12ack16ack20me3 | 1.33E-08 | 0        | 2.25E-07 | 5E-09    | 8.17E-08 | 5.5E-08  | 2.31E-08 | 0        | 3.54E-07 | 1E-08    | 1.34E-07 | 1.1E-07  |
| X0acS1unR3me1K5ack8ack12ack16unK20me3 | 1.77E-07 | 6E-08    | 4.17E-08 | 0        | 1.92E-07 | 5E-09    | 2.25E-07 | 5.29E-08 | 7.33E-08 | 0        | 1.28E-07 | 5.77E-09 |
| X0unS1phR3unK5ack8unK12unK16ack20me1  | 1.1E-07  | 0        | 5.33E-08 | 0        | 2.48E-07 | 0        | 1.15E-07 | 0        | 7.58E-08 | 0        | 1.76E-07 | 0        |
| X0acS1unR3me1K5ack8unK12unK16ack20me1 | 3.33E-08 | 0        | 1.63E-07 | 0        | 1.77E-07 | 3E-08    | 4.93E-08 | 0        | 1.7E-07  | 0        | 1.47E-07 | 4.76E-08 |
| X0unS1phR3me1K5unK8ack12ack16unK20me2 | 1.87E-07 | 0        | 1.25E-07 | 0        | 1.6E-07  | 0        | 1.62E-07 | 0        | 1.26E-07 | 0        | 1.51E-07 | 0        |
| X0acS1phR3unK5unK8unK12unK16ack20me3  | 1.5E-07  | 0        | 5E-08    | 0        | 2.58E-07 | 0        | 7E-08    | 0        | 3.52E-08 | 0        | 2.31E-07 | 0        |
| X0unS1unR3me1K5ack8ack12ack16ack20me3 | 0        | 0        | 2.62E-07 | 0        | 1.35E-07 | 0        | 0        | 0        | 4.65E-07 | 0        | 7.61E-08 | 0        |
| X0unS1unR3unK5unK8ack12ack16ack20me1  | 2.67E-08 | 5.33E-08 | 8.33E-08 | 0        | 3.67E-08 | 3.63E-07 | 3.06E-08 | 9.24E-08 | 1.05E-07 | 0        | 7.2E-08  | 7.25E-07 |
| X0acS1phR3me1K5unK8ack12ack16unK20un  | 1.27E-07 | 0        | 3.83E-08 | 2.25E-08 | 2.82E-07 | 7.5E-09  | 1.67E-07 | 0        | 3.76E-08 | 3.86E-08 | 2.2E-07  | 9.57E-09 |
| X0acS1phR3unK5ack8unK12unK16unK20me1  | 3.33E-08 | 0        | 3.67E-08 | 0        | 2.87E-07 | 1E-07    | 3.51E-08 | 0        | 2.16E-08 | 0        | 5.84E-07 | 2E-07    |
| X0unS1phR3unK5unK8unK12unK16ack20me3  | 1.7E-07  | 2.67E-08 | 2.23E-07 | 0        | 8.83E-08 | 0        | 1.13E-07 | 4.62E-08 | 2.83E-07 | 0        | 1.1E-07  | 0        |
| X0acS1phR3me1K5unK8unK12unK16unK20me1 | 7E-08    | 0        | 2.62E-07 | 0        | 1.2E-07  | 2.5E-09  | 4.58E-08 | 0        | 2.82E-07 | 0        | 1.41E-07 | 5E-09    |
| X0unS1phR3unK5ack8ack12unK16unK20me1  | 1.07E-07 | 0        | 9.5E-08  | 0        | 2.78E-07 | 0        | 4.04E-08 | 0        | 6.12E-08 | 0        | 2.87E-07 | 0        |

|                                       |          |          |          |          |          |          |          |          |          |          |          |          |
|---------------------------------------|----------|----------|----------|----------|----------|----------|----------|----------|----------|----------|----------|----------|
| X0acS1unR3me1K5unK8unK12acK16unK20me3 | 0        | 0        | 1.67E-09 | 0        | 4.38E-07 | 0        | 0        | 0        | 4.08E-09 | 0        | 6.04E-07 | 0        |
| X0unS1phR3me1K5unK8acK12unK16acK20me2 | 3E-08    | 0        | 1.85E-07 | 0        | 1.33E-08 | 3.55E-07 | 2.65E-08 | 0        | 4.05E-07 | 0        | 2.34E-08 | 4.73E-07 |
| X0acS1phR3me1K5acK8acK12unK16unK20un  | 9.33E-08 | 5.53E-07 | 2.33E-08 | 0        | 1.02E-07 | 2.5E-09  | 6.03E-08 | 8.73E-07 | 3.61E-08 | 0        | 1.55E-07 | 5E-09    |
| X0acS1phR3me1K5unK8acK12unK16unK20me1 | 0        | 6.2E-07  | 0        | 2.25E-08 | 1.4E-07  | 0        | 0        | 1.07E-06 | 0        | 4.5E-08  | 3.43E-07 | 0        |
| X0unS1unR3me1K5unK8acK12unK16unK20me3 | 6.67E-09 | 0        | 4.63E-07 | 0        | 0        | 0        | 1.15E-08 | 0        | 1.13E-06 | 0        | 0        | 0        |
| X0unS1unR3unK5unK8acK12unK16acK20me3  | 1E-08    | 4.17E-07 | 1.67E-09 | 0        | 0        | 3.85E-07 | 1.73E-08 | 7.22E-07 | 4.08E-09 | 0        | 0        | 6.99E-07 |
| X0acS1unR3me1K5unK8acK12acK16unK20me2 | 1.2E-07  | 0        | 1.88E-07 | 0        | 2.57E-07 | 1.75E-08 | 1.35E-07 | 0        | 1.95E-07 | 0        | 3.94E-07 | 3.5E-08  |
| X0acS1phR3unK5unK8unK12acK16unK20me3  | 1.8E-07  | 0        | 6.83E-08 | 0        | 3.73E-07 | 0        | 8E-08    | 0        | 4.71E-08 | 0        | 3.66E-07 | 0        |
| X0acS1phR3me1K5acK8unK12acK16unK20un  | 6.67E-08 | 0        | 3E-08    | 0        | 4.72E-07 | 0        | 1.15E-07 | 0        | 3.1E-08  | 0        | 8.07E-07 | 0        |
| X0acS1phR3unK5unK8unK12unK16acK20un   | 2.07E-07 | 0        | 1.93E-07 | 0        | 2.55E-07 | 0        | 2.89E-07 | 0        | 1.81E-07 | 0        | 3.99E-07 | 0        |
| X0unS1phR3unK5acK8acK12unK16unK20me3  | 2.87E-07 | 0        | 2.65E-07 | 0        | 1.52E-07 | 0        | 1.94E-07 | 0        | 1.37E-07 | 0        | 1.7E-07  | 0        |
| X0unS1unR3unK5acK8acK12acK16acK20un   | 3.83E-07 | 1.53E-07 | 5.83E-08 | 7.25E-08 | 1.68E-07 | 2.75E-08 | 3.39E-07 | 2.66E-07 | 3.82E-08 | 1.45E-07 | 1.49E-07 | 5.5E-08  |
| X0unS1phR3me1K5unK8acK12unK16unK20me3 | 6.9E-07  | 0        | 9.83E-08 | 1.5E-08  | 1.23E-07 | 0        | 8.76E-07 | 0        | 8.33E-08 | 3E-08    | 1.5E-07  | 0        |
| X0acS1phR3me1K5unK8acK12unK16unK20me3 | 2.7E-07  | 0        | 9.83E-08 | 0        | 3.52E-07 | 0        | 3.49E-07 | 0        | 1.18E-07 | 0        | 2.87E-07 | 0        |
| X0unS1unR3me1K5unK8unK12acK16unK20me1 | 1.67E-08 | 6.67E-09 | 1.83E-08 | 3.58E-07 | 5E-09    | 5.05E-07 | 1.15E-08 | 1.15E-08 | 1.94E-08 | 7.15E-07 | 8.37E-09 | 9.97E-07 |
| X0unS1phR3unK5unK8unK12acK16unK20me3  | 3.63E-07 | 0        | 3.83E-07 | 0        | 9.5E-08  | 0        | 3.25E-07 | 0        | 3.22E-07 | 0        | 9.77E-08 | 0        |
| X0unS1phR3me1K5unK8unK12acK16acK20un  | 2.37E-07 | 0        | 1.18E-07 | 2.5E-08  | 3.93E-07 | 2.5E-08  | 3.32E-07 | 0        | 1.13E-07 | 5E-08    | 3.42E-07 | 3.32E-08 |
| X0unS1unR3me1K5acK8acK12acK16acK20me2 | 2.67E-08 | 0        | 5.83E-08 | 0        | 6.33E-07 | 0        | 1.15E-08 | 0        | 4.17E-08 | 0        | 1.19E-06 | 0        |
| X0unS1phR3unK5acK8unK12acK16unK20un   | 1.63E-07 | 0        | 4.9E-07  | 3.75E-08 | 1.32E-07 | 0        | 8.14E-08 | 0        | 5.29E-07 | 7.5E-08  | 1E-07    | 0        |
| X0unS1unR3unK5unK8unK12acK16unK20me1  | 0        | 0        | 0        | 0        | 7.28E-07 | 2.75E-08 | 0        | 0        | 0        | 0        | 1.78E-06 | 5.5E-08  |
| X0acS1unR3me1K5unK8acK12unK16acK20me3 | 0        | 2.97E-07 | 3.98E-07 | 1.75E-08 | 1.17E-07 | 1.18E-07 | 0        | 5.14E-07 | 9.42E-07 | 2.87E-08 | 2.1E-07  | 1.41E-07 |
| X0acS1phR3me1K5acK8unK12unK16unK20me3 | 1.97E-07 | 0        | 4.25E-07 | 0        | 2.42E-07 | 0        | 2.89E-07 | 0        | 3.26E-07 | 0        | 1.87E-07 | 0        |
| X0unS1unR3unK5acK8unK12acK16unK20un   | 0        | 1.51E-06 | 0        | 1.5E-08  | 1.67E-09 | 2.5E-09  | 0        | 2.62E-06 | 0        | 1.91E-08 | 4.08E-09 | 5E-09    |
| X0unS1phR3unK5unK8acK12unK16acK20me1  | 9.13E-07 | 0        | 8E-08    | 1.6E-07  | 1.28E-07 | 0        | 1.29E-06 | 0        | 6.96E-08 | 3.2E-07  | 7.78E-08 | 0        |
| X0unS1phR3me1K5unK8unK12acK16unK20me3 | 6.6E-07  | 0        | 1.85E-07 | 0        | 2.68E-07 | 0        | 8.67E-07 | 0        | 1.7E-07  | 0        | 2.44E-07 | 0        |
| X0acS1unR3me1K5unK8acK12acK16acK20me1 | 0        | 0        | 1.33E-08 | 0        | 7.72E-07 | 0        | 0        | 0        | 2.16E-08 | 0        | 1.88E-06 | 0        |
| X0acS1phR3unK5unK8acK12unK16unK20un   | 3.47E-07 | 0        | 5.2E-07  | 0        | 9.17E-08 | 0        | 2.82E-07 | 0        | 7.24E-07 | 0        | 1.08E-07 | 0        |
| X0acS1phR3unK5acK8unK12acK16unK20un   | 1.4E-07  | 9.6E-07  | 1.45E-07 | 0        | 9.67E-08 | 0        | 6.24E-08 | 1.66E-06 | 5.09E-08 | 0        | 9.5E-08  | 0        |
| X0acS1phR3me1K5unK8unK12unK16unK20me3 | 9.03E-07 | 0        | 1.43E-07 | 1.25E-08 | 1.63E-07 | 5.25E-08 | 1.09E-06 | 0        | 1.11E-07 | 1.89E-08 | 2.19E-07 | 8.62E-08 |
| X0unS1phR3me1K5acK8unK12unK16acK20un  | 2.03E-07 | 9.27E-07 | 6.33E-08 | 2.25E-07 | 5.5E-08  | 1.75E-08 | 2.58E-07 | 4.6E-07  | 5.43E-08 | 4.5E-07  | 2.07E-08 | 3.5E-08  |
| X0unS1phR3unK5acK8unK12unK16unK20me3  | 5.47E-07 | 0        | 2.55E-07 | 3.75E-08 | 3.12E-07 | 0        | 2.97E-07 | 0        | 2.02E-07 | 7.5E-08  | 4.48E-07 | 0        |
| X0unS1phR3me1K5acK8unK12unK16acK20me1 | 1.97E-07 | 1.93E-07 | 3.83E-07 | 0        | 0        | 4.3E-07  | 3.41E-07 | 3.35E-07 | 6.05E-07 | 0        | 0        | 8.6E-07  |
| X0unS1unR3unK5acK8unK12unK16acK20un   | 6.47E-07 | 0        | 3.8E-07  | 0        | 1.48E-07 | 3.25E-08 | 1.12E-06 | 0        | 9.31E-07 | 0        | 3.63E-07 | 6.5E-08  |
| X0unS1phR3unK5unK8acK12acK16unK20me2  | 0        | 1.03E-07 | 1.63E-07 | 2.3E-07  | 0        | 7.75E-07 | 0        | 1.79E-07 | 3.9E-07  | 4.6E-07  | 0        | 1.55E-06 |
| X0acS1phR3unK5acK8acK12unK16unK20un   | 5.87E-07 | 0        | 3.35E-07 | 0        | 2.65E-07 | 0        | 3.52E-07 | 0        | 5.96E-08 | 0        | 2.58E-07 | 0        |
| X0acS1unR3me1K5acK8unK12unK16acK20un  | 6.67E-09 | 1.73E-06 | 1.5E-08  | 0        | 1.83E-08 | 1.25E-08 | 1.15E-08 | 3E-06    | 2.51E-08 | 0        | 4.49E-08 | 1.5E-08  |
| X0acS1phR3unK5unK8acK12unK16unK20me2  | 0        | 1.6E-06  | 0        | 1.1E-07  | 3.33E-09 | 7E-08    | 0        | 1.61E-06 | 0        | 1.1E-07  | 5.16E-09 | 1.4E-07  |
| X0unS1phR3me1K5unK8acK12unK16acK20me3 | 1.57E-07 | 0        | 7.33E-08 | 0        | 7.82E-07 | 0        | 2.71E-07 | 0        | 1.8E-07  | 0        | 6.82E-07 | 0        |
| X0acS1phR3unK5acK8unK12unK16acK20un   | 4.73E-07 | 0        | 5.22E-07 | 0        | 2.08E-07 | 0        | 7.09E-08 | 0        | 1.92E-07 | 0        | 1.25E-07 | 0        |
| X0unS1unR3unK5unK8acK12unK16unK20un   | 0        | 0        | 9.92E-07 | 0        | 0        | 0        | 0        | 0        | 1.85E-06 | 0        | 0        | 0        |
| X0unS1unR3me1K5unK8acK12acK16acK20me3 | 3.33E-08 | 0        | 8.05E-07 | 0        | 1.8E-07  | 0        | 3.51E-08 | 0        | 8.13E-07 | 0        | 3.01E-07 | 0        |
| X0unS1phR3me1K5unK8unK12unK16acK20me3 | 4.13E-07 | 0        | 5.33E-08 | 0        | 1.08E-07 | 9.53E-07 | 6.22E-07 | 0        | 4.46E-08 | 0        | 8.06E-08 | 1.91E-06 |
| X0unS1unR3unK5acK8acK12acK16unK20me2  | 6.67E-09 | 1.76E-06 | 3.67E-08 | 0        | 1.03E-07 | 0        | 1.15E-08 | 3.04E-06 | 2.58E-08 | 0        | 1.38E-07 | 0        |
| X0acS1phR3me1K5unK8acK12unK16unK20me2 | 1.87E-07 | 0        | 4.27E-07 | 0        | 5.15E-07 | 0        | 1.76E-07 | 0        | 4.15E-07 | 0        | 3.03E-07 | 0        |

|                                       |          |          |          |          |          |          |          |          |          |          |          |          |
|---------------------------------------|----------|----------|----------|----------|----------|----------|----------|----------|----------|----------|----------|----------|
| X0acS1unR3me1K5acK8unK12unK16unK20me3 | 3.33E-09 | 0        | 8.28E-07 | 2.58E-07 | 6.67E-09 | 8.25E-08 | 5.77E-09 | 0        | 2.03E-06 | 4.95E-07 | 1.63E-08 | 1.65E-07 |
| X0acS1unR3me1K5unK8unK12acK16unK20me1 | 0        | 6.83E-07 | 4.8E-07  | 2.75E-07 | 1.67E-09 | 1.18E-07 | 0        | 1.18E-06 | 1.18E-06 | 3.65E-07 | 4.08E-09 | 1.86E-07 |
| X0acS1unR3me1K5acK8unK12acK16acK20me3 | 0        | 1.56E-06 | 2.4E-07  | 0        | 7E-08    | 0        | 0        | 2.7E-06  | 3.91E-07 | 0        | 7.46E-08 | 0        |
| X0acS1phR3me1K5unK8unK12acK16unK20me1 | 3.33E-09 | 3E-07    | 1.33E-08 | 0        | 9.25E-07 | 0        | 5.77E-09 | 5.2E-07  | 2.8E-08  | 0        | 1.85E-06 | 0        |
| X0unS1phR3unK5acK8unK12acK16acK20me1  | 5.77E-07 | 0        | 3.18E-07 | 0        | 4.83E-07 | 0        | 8.96E-07 | 0        | 4.54E-07 | 0        | 4.97E-07 | 0        |
| X0acS1phR3unK5unK8acK12unK16unK20me1  | 6.67E-08 | 0        | 6.83E-08 | 0        | 9.9E-07  | 0        | 5.51E-08 | 0        | 4.07E-08 | 0        | 2E-06    | 0        |
| X0unS1phR3me1K5unK8acK12acK16acK20me1 | 0        | 1.9E-06  | 0        | 0        | 6.67E-09 | 2.3E-07  | 0        | 2.08E-06 | 0        | 0        | 1.21E-08 | 2.7E-07  |
| X0unS1unR3me1K5acK8acK12acK16acK20me1 | 2.47E-07 | 1.67E-08 | 1.25E-07 | 0        | 8.68E-07 | 0        | 3.29E-07 | 1.53E-08 | 2.34E-07 | 0        | 2.06E-06 | 0        |
| X0acS1phR3me1K5acK8unK12unK16unK20me1 | 3.33E-09 | 3.07E-07 | 1.67E-09 | 4.25E-08 | 9.4E-07  | 0        | 5.77E-09 | 5.31E-07 | 4.08E-09 | 4.79E-08 | 1.59E-06 | 0        |
| X0unS1unR3me1K5acK8acK12acK16unK20me2 | 2.57E-07 | 0        | 5.15E-07 | 4.25E-08 | 3.45E-07 | 1.83E-07 | 1.53E-08 | 0        | 5.18E-07 | 5.68E-08 | 3.07E-07 | 3.65E-07 |
| X0acS1phR3unK5unK8unK12acK16acK20un   | 4.07E-07 | 0        | 3.85E-07 | 0        | 6.2E-07  | 0        | 1.43E-07 | 0        | 2.25E-07 | 0        | 5.23E-07 | 0        |
| X0unS1phR3unK5acK8acK12unK16acK20me2  | 1.1E-07  | 0        | 0        | 1.79E-06 | 0        | 7E-08    | 1.91E-07 | 0        | 0        | 2.16E-06 | 0        | 1.4E-07  |
| X0acS1unR3me1K5unK8acK12unK16unK20me1 | 0        | 0        | 8.33E-09 | 9.25E-08 | 1.25E-06 | 0        | 0        | 0        | 2.04E-08 | 1.85E-07 | 3.05E-06 | 0        |
| X0unS1phR3me1K5unK8acK12acK16acK20un  | 1.67E-08 | 2.06E-06 | 1.33E-08 | 0        | 2.58E-07 | 2.5E-08  | 2.08E-08 | 1.95E-06 | 2.16E-08 | 0        | 6.13E-07 | 3.79E-08 |
| X0acS1phR3unK5unK8acK12acK16unK20un   | 7.87E-07 | 0        | 6.3E-07  | 0        | 3.5E-07  | 0        | 1.03E-07 | 0        | 2.08E-07 | 0        | 3.08E-07 | 0        |
| X0acS1phR3unK5unK8acK12unK16unK20me3  | 7.2E-07  | 0        | 6.7E-07  | 0        | 4.1E-07  | 0        | 2.46E-07 | 0        | 1.63E-07 | 0        | 1.96E-07 | 0        |
| X0acS1phR3me1K5unK8acK12unK16acK20me2 | 0        | 4.67E-08 | 0        | 8.5E-07  | 7.5E-07  | 2.23E-07 | 0        | 8.08E-08 | 0        | 9.82E-07 | 1.83E-06 | 4.45E-07 |
| X0acS1phR3unK5acK8unK12unK16unK20me3  | 6.13E-07 | 0        | 6.33E-07 | 0        | 5.87E-07 | 2.5E-08  | 1.54E-07 | 0        | 2.5E-07  | 0        | 4.08E-07 | 5E-08    |
| X0unS1unR3me1K5unK8acK12unK16acK20me3 | 4E-08    | 0        | 2.58E-07 | 0        | 1.34E-06 | 0        | 6.93E-08 | 0        | 4.04E-07 | 0        | 1.95E-06 | 0        |
| X0unS1unR3me1K5unK8unK12acK16acK20me1 | 1.63E-07 | 5.93E-07 | 1.15E-06 | 5E-09    | 1.73E-07 | 0        | 1.48E-07 | 1.03E-06 | 8.22E-07 | 1E-08    | 1.86E-07 | 0        |
| X0unS1unR3unK5unK8acK12acK16acK20un   | 8.67E-08 | 3.49E-06 | 0        | 0        | 0        | 0        | 1.5E-07  | 6.04E-06 | 0        | 0        | 0        | 0        |
| X0unS1unR3unK5unK8acK12unK16unK20me1  | 0        | 0        | 1.07E-06 | 0        | 0        | 1.13E-06 | 0        | 0        | 2.63E-06 | 0        | 0        | 1.29E-06 |
| X0acS1phR3me1K5unK8unK12unK16acK20me3 | 5.4E-07  | 1E-08    | 7.87E-07 | 0        | 7.67E-07 | 0        | 8.42E-07 | 1.73E-08 | 7.29E-07 | 0        | 7.13E-07 | 0        |
| X0acS1phR3me1K5acK8unK12unK16acK20me2 | 0        | 0        | 0        | 0        | 0        | 2.76E-06 | 0        | 0        | 0        | 0        | 0        | 5.53E-06 |
| X0unS1unR3unK5acK8acK12unK16unK20me1  | 3.8E-07  | 2E-08    | 0        | 1.73E-07 | 1.59E-06 | 0        | 6.58E-07 | 3.46E-08 | 0        | 3.45E-07 | 3.9E-06  | 0        |
| X0unS1unR3me1K5unK8acK12unK16acK20me2 | 3.33E-09 | 2.07E-07 | 1.67E-09 | 0        | 3.33E-09 | 2.85E-06 | 5.77E-09 | 2.05E-07 | 4.08E-09 | 0        | 5.16E-09 | 5.63E-06 |
| X0acS1phR3unK5unK8unK12acK16unK20un   | 1.1E-06  | 8.17E-07 | 5.23E-07 | 3E-08    | 5.82E-07 | 0        | 1.19E-06 | 1.41E-06 | 4.12E-07 | 6E-08    | 9.09E-07 | 0        |
| X0unS1phR3unK5unK8unK12unK16unK20me3  | 3E-08    | 3.04E-06 | 1.5E-07  | 1E-08    | 4.08E-07 | 1.75E-08 | 3.61E-08 | 3.91E-06 | 2.21E-07 | 2E-08    | 4.44E-07 | 3.5E-08  |
| X0acS1phR3me1K5unK8unK12acK16unK20me2 | 7.9E-07  | 0        | 5.75E-07 | 2.5E-09  | 1.35E-06 | 0        | 2.69E-07 | 0        | 3.6E-07  | 5E-09    | 8.31E-07 | 0        |
| X0acS1phR3unK5unK8unK12unK16unK20me3  | 3.07E-07 | 0        | 7.82E-07 | 0        | 1.4E-06  | 0        | 6.66E-08 | 0        | 8.84E-07 | 0        | 2.15E-06 | 0        |
| X0unS1unR3me1K5acK8unK12acK16acK20me2 | 1.41E-06 | 1E-08    | 9.33E-07 | 3.25E-07 | 3.78E-07 | 3.48E-07 | 1.57E-06 | 1.73E-08 | 1.05E-06 | 5.49E-07 | 2.74E-07 | 5.87E-07 |
| X0unS1phR3unK5unK8acK12unK16unK20me1  | 0        | 0        | 5.08E-07 | 0        | 1.61E-06 | 7.33E-07 | 0        | 0        | 1.25E-06 | 0        | 3.94E-06 | 1.47E-06 |
| X0unS1phR3unK5acK8unK12unK16acK20un   | 4.07E-07 | 0        | 1.05E-06 | 1.45E-06 | 4.67E-07 | 0        | 1.76E-07 | 0        | 1.48E-06 | 2.9E-06  | 6.95E-07 | 0        |
| X0acS1unR3unK5acK8acK12unK16unK20me3  | 4.53E-07 | 5.67E-08 | 2.78E-07 | 2.5E-06  | 1.8E-07  | 6.18E-07 | 5.29E-07 | 9.81E-08 | 3.21E-07 | 8.12E-07 | 1.84E-07 | 7.89E-07 |
| X0unS1phR3unK5acK8acK12acK16unK20me1  | 7.03E-07 | 0        | 1.07E-06 | 0        | 1.38E-06 | 0        | 9.84E-07 | 0        | 1.26E-06 | 0        | 1.54E-06 | 0        |
| X0acS1unR3me1K5unK8unK12unK16unK20un  | 0        | 5.46E-06 | 1.5E-08  | 0        | 5E-08    | 2.25E-08 | 0        | 9.46E-06 | 3.67E-08 | 0        | 8.37E-08 | 1.71E-08 |
| X0unS1phR3me1K5acK8unK12unK16unK20me2 | 1.3E-06  | 0        | 1.01E-06 | 2E-08    | 1.11E-06 | 7.5E-08  | 2.82E-07 | 0        | 9.13E-07 | 4E-08    | 3.73E-07 | 9.98E-08 |
| X0acS1unR3me1K5acK8acK12acK16unK20un  | 6.67E-09 | 0        | 2.67E-08 | 4.13E-07 | 6.67E-08 | 3.71E-06 | 5.77E-09 | 0        | 2.88E-08 | 4.49E-07 | 1.16E-07 | 3.03E-06 |
| X0unS1unR3unK5acK8unK12unK16unK20me3  | 4.63E-07 | 0        | 3.33E-09 | 0        | 0        | 3.98E-06 | 8.03E-07 | 0        | 5.16E-09 | 0        | 0        | 7.96E-06 |
| X0acS1phR3unK5acK8unK12acK16unK20me2  | 0        | 5.87E-06 | 0        | 0        | 0        | 0        | 0        | 1.02E-05 | 0        | 0        | 0        | 0        |
| X0acS1phR3unK5unK8acK12unK16acK20un   | 6.87E-07 | 2.53E-06 | 7.93E-07 | 0        | 7.8E-07  | 0        | 1.33E-07 | 4.38E-06 | 3E-07    | 0        | 8.01E-07 | 0        |
| X0unS1unR3unK5unK8unK12acK16unK20un   | 4.67E-08 | 5.97E-07 | 2.76E-06 | 8.5E-08  | 9.33E-08 | 1.75E-08 | 8.08E-08 | 1.35E-07 | 4.25E-06 | 1.03E-07 | 1.61E-07 | 2.22E-08 |
| X0acS1unR3me1K5acK8acK12unK16unK20un  | 0        | 6.66E-06 | 3.33E-09 | 0        | 1.67E-09 | 0        | 0        | 2.29E-07 | 5.16E-09 | 0        | 4.08E-09 | 0        |
| X0unS1phR3unK5unK8acK12acK16unK20un   | 5.23E-07 | 0        | 7.82E-07 | 2.07E-06 | 1.07E-06 | 1.85E-07 | 3.52E-07 | 0        | 7.98E-07 | 2.28E-06 | 1.12E-06 | 2.14E-07 |

|                                       |          |          |          |          |          |          |          |          |          |          |          |          |
|---------------------------------------|----------|----------|----------|----------|----------|----------|----------|----------|----------|----------|----------|----------|
| X0unS1phR3unK5acK8acK12acK16acK20un   | 0        | 4.11E-06 | 5.5E-08  | 2.19E-06 | 1.67E-08 | 4E-08    | 0        | 7.08E-06 | 8.98E-08 | 3.87E-06 | 2.58E-08 | 8E-08    |
| X0acS1unR3me1K5acK8unK12acK16acK20me1 | 2.43E-07 | 4.93E-06 | 8.83E-08 | 0        | 1.05E-06 | 0        | 4.13E-07 | 1.54E-06 | 1.48E-07 | 0        | 2.15E-06 | 0        |
| X0unS1phR3me1K5unK8unK12acK16unK20me2 | 1.08E-06 | 0        | 1.21E-06 | 0        | 2.2E-06  | 2.33E-07 | 9.38E-07 | 0        | 1.14E-06 | 0        | 1.95E-06 | 2.84E-07 |
| X0acS1phR3unK5acK8unK12unK16unK20me2  | 3.63E-07 | 5.69E-06 | 6.1E-07  | 7E-07    | 6.5E-08  | 0        | 3.59E-07 | 9.86E-06 | 3.29E-07 | 1.4E-06  | 5.24E-08 | 0        |
| X0unS1unR3me1K5acK8unK12unK16acK20me3 | 1.8E-07  | 4.83E-06 | 7.92E-07 | 1.68E-07 | 7.87E-07 | 0        | 3.12E-07 | 5.33E-06 | 9.08E-07 | 3.35E-07 | 7.88E-07 | 0        |
| X0unS1phR3me1K5acK8unK12unK16acK20me3 | 6.3E-07  | 1.13E-07 | 1.32E-06 | 2.5E-09  | 2.57E-06 | 2.5E-08  | 5.31E-07 | 1.63E-07 | 1.04E-06 | 5E-09    | 1.74E-06 | 5E-08    |
| X0unS1phR3me1K5unK8unK12acK16acK20me1 | 6.07E-07 | 4.37E-07 | 1.26E-06 | 0        | 2.85E-06 | 0        | 1.05E-06 | 7.56E-07 | 1.71E-06 | 0        | 4.46E-06 | 0        |
| X0acS1unR3me1K5acK8unK12acK16unK20me2 | 7.67E-08 | 0        | 1.55E-07 | 1.36E-06 | 7.5E-08  | 6.06E-06 | 9.87E-08 | 0        | 2.14E-07 | 2.68E-06 | 9.5E-08  | 7.53E-06 |
| X0acS1unR3me1K5unK8unK12acK16acK20me1 | 2.01E-06 | 0        | 2.88E-06 | 1.5E-08  | 1.54E-06 | 0        | 1.45E-06 | 0        | 1.1E-06  | 3E-08    | 9.87E-07 | 0        |
| X0unS1phR3me1K5unK8acK12unK16unK20me2 | 1.45E-06 | 0        | 8.4E-07  | 0        | 3.99E-06 | 0        | 6.32E-07 | 0        | 4.8E-07  | 0        | 4.45E-06 | 0        |
| X0acS1unR3me1K5acK8acK12unK16acK20me1 | 5.97E-07 | 8.19E-06 | 2.27E-07 | 8.83E-07 | 3.58E-07 | 0        | 1.03E-06 | 3.46E-06 | 3.85E-07 | 1.77E-06 | 6.93E-07 | 0        |
| X0unS1unR3unK5unK8acK12unK16acK20me1  | 0        | 0        | 2.63E-07 | 7.09E-06 | 9.6E-07  | 0        | 0        | 0        | 4E-07    | 1.38E-05 | 2.35E-06 | 0        |
| X0acS1phR3unK5acK8unK12unK16unK20me2  | 0        | 3.66E-06 | 2.05E-07 | 4.06E-06 | 1.67E-09 | 1.91E-06 | 0        | 4.64E-06 | 4.92E-07 | 3.62E-06 | 4.08E-09 | 3.55E-06 |
| X0acS1phR3unK5unK8acK12acK16acK20un   | 0        | 4.74E-06 | 1.67E-08 | 4.02E-06 | 8.18E-07 | 2.8E-07  | 0        | 5.85E-06 | 4.08E-08 | 2.74E-06 | 2E-06    | 2.27E-07 |
| X0unS1phR3unK5acK8acK12unK16unK20un   | 2.02E-06 | 5.1E-06  | 1.42E-06 | 8.28E-07 | 6.73E-07 | 0        | 1.54E-06 | 3.29E-06 | 1.53E-06 | 1.29E-06 | 9.17E-07 | 0        |
| X0unS1unR3unK5unK8unK12acK16acK20me1  | 6.13E-06 | 2.77E-07 | 3.03E-06 | 0        | 1.4E-07  | 0        | 3.78E-06 | 4.79E-07 | 2.48E-06 | 0        | 3.14E-07 | 0        |
| X0unS1phR3unK5unK8unK12acK16acK20me1  | 4.61E-06 | 0        | 2.52E-06 | 0        | 1.8E-06  | 0        | 1.43E-06 | 0        | 1.07E-06 | 0        | 9.52E-07 | 0        |
| X0acS1unR3me1K5unK8unK12acK16acK20me3 | 2.07E-07 | 0        | 1.26E-06 | 3E-08    | 5.23E-06 | 2E-08    | 2.11E-07 | 0        | 1.1E-06  | 6E-08    | 7.77E-06 | 4E-08    |
| X0acS1unR3unK5acK8acK12acK16unK20me3  | 2.55E-06 | 1.65E-06 | 1.14E-06 | 2.27E-06 | 1.94E-06 | 0        | 5.68E-07 | 4.14E-07 | 5.11E-07 | 2.78E-06 | 3.61E-06 | 0        |
| X0acS1phR3unK5acK8unK12acK16unK20me1  | 2.1E-07  | 6.33E-08 | 4.1E-06  | 3.25E-08 | 2.36E-06 | 1.63E-07 | 2.74E-07 | 1.1E-07  | 4.38E-06 | 6.5E-08  | 2.53E-06 | 3.25E-07 |
| X0acS1unR3unK5acK8unK12acK16unK20me3  | 3.37E-07 | 0        | 1.2E-07  | 8.72E-06 | 4.37E-07 | 6.93E-07 | 3.12E-07 | 0        | 1.51E-07 | 5.81E-06 | 6.11E-07 | 8.05E-07 |
| X0acS1phR3unK5unK8acK12unK16acK20me2  | 0        | 0        | 1.9E-06  | 2.52E-06 | 1.14E-06 | 3.54E-06 | 0        | 0        | 4.24E-06 | 3.02E-06 | 2.8E-06  | 6.17E-06 |
| X0unS1unR3me1K5unK8acK12acK16acK20me2 | 0.000001 | 3.07E-07 | 4.03E-06 | 7.63E-07 | 1.3E-06  | 1.13E-06 | 3.87E-07 | 5.14E-07 | 4.73E-06 | 7.27E-07 | 2.15E-06 | 1.03E-06 |
| X0acS1phR3me1K5unK8unK12acK16acK20me2 | 0        | 6.33E-08 | 0        | 7.57E-06 | 1.31E-06 | 1.93E-06 | 0        | 1.01E-07 | 0        | 1.18E-05 | 3.19E-06 | 2.69E-06 |
| X0unS1unR3me1K5acK8unK12unK16unK20me2 | 0        | 0        | 1.71E-06 | 0        | 6.12E-07 | 8.23E-06 | 0        | 0        | 4.19E-06 | 0        | 1.5E-06  | 1.65E-05 |
| X0acS1phR3unK5acK8acK12unK16unK20me1  | 1.57E-06 | 2.67E-07 | 1.76E-06 | 3.55E-07 | 5.22E-06 | 3.25E-08 | 9.93E-07 | 4.62E-08 | 1.2E-06  | 6.71E-07 | 4.75E-06 | 6.5E-08  |
| X0acS1unR3me1K5acK8acK12acK16unK20me1 | 3.79E-06 | 0        | 4.34E-06 | 1.5E-08  | 1.91E-06 | 3.45E-07 | 6.11E-06 | 0        | 4.31E-06 | 3E-08    | 2.86E-06 | 6.9E-07  |
| X0unS1unR3me1K5unK8unK12acK16unK20un  | 0        | 0        | 3.1E-06  | 2E-08    | 5.38E-06 | 0        | 0        | 0        | 7.6E-06  | 4E-08    | 9.17E-06 | 0        |
| X0acS1unR3me1K5acK8unK12acK16acK20me2 | 1.01E-06 | 0        | 9.33E-07 | 7.91E-06 | 9.6E-07  | 1.6E-06  | 9.21E-07 | 0        | 1.33E-06 | 9.46E-06 | 1.3E-06  | 2.26E-06 |
| X0unS1unR3me1K5unK8unK12unK16acK20un  | 9.8E-07  | 0        | 8.52E-06 | 2.5E-09  | 3.33E-09 | 1E-08    | 1.7E-06  | 0        | 1.29E-05 | 5E-09    | 8.16E-09 | 1.41E-08 |
| X0unS1phR3unK5unK8unK12acK16acK20un   | 1.77E-07 | 0        | 1.57E-05 | 0        | 1.42E-07 | 0        | 1E-07    | 0        | 3.82E-05 | 0        | 1.85E-07 | 0        |
| X0unS1phR3me1K5acK8acK12acK16unK20me2 | 1.16E-06 | 9.67E-08 | 7.37E-07 | 0        | 1.96E-06 | 1.94E-05 | 1.86E-06 | 1.67E-07 | 1.56E-06 | 0        | 2.31E-06 | 3.87E-05 |
| X0acS1phR3unK5unK8unK12acK16unK20me1  | 1.33E-08 | 0        | 3.02E-07 | 0        | 1.63E-05 | 0        | 1.53E-08 | 0        | 4.99E-07 | 0        | 3.92E-05 | 0        |
| X0unS1phR3unK5unK8unK12acK16unK20me2  | 0        | 3.21E-05 | 6.67E-09 | 0        | 3.33E-09 | 1.26E-06 | 0        | 2.09E-05 | 1.63E-08 | 0        | 5.16E-09 | 1.55E-06 |
| X0unS1phR3me1K5unK8unK12unK16unK20me1 | 1.97E-07 | 6.89E-06 | 1.55E-05 | 0        | 2E-07    | 5.5E-08  | 3.15E-07 | 1.58E-06 | 3.78E-05 | 0        | 9.06E-08 | 1.1E-07  |
| X0acS1unR3me1K5unK8unK12unK16acK20un  | 0        | 0        | 7.93E-06 | 1.76E-05 | 3.46E-06 | 0        | 0        | 0        | 1.23E-05 | 3.53E-05 | 8.47E-06 | 0        |
| X0acS1unR3unK5acK8unK12unK16unK20me3  | 1.6E-07  | 0        | 2E-08    | 3.46E-05 | 5E-08    | 0        | 2.69E-07 | 0        | 2.19E-08 | 6.7E-05  | 9.51E-08 | 0        |
| X0acS1unR3unK5acK8unK12unK16acK20me3  | 7.67E-08 | 0        | 1.02E-07 | 2.99E-05 | 7.95E-07 | 3.91E-06 | 7.64E-08 | 0        | 1.48E-07 | 2.37E-05 | 1.71E-06 | 6.84E-06 |
| X0unS1phR3me1K5acK8unK12acK16acK20me2 | 0        | 5E-05    | 5E-09    | 7.33E-07 | 1.67E-09 | 0        | 0        | 8.65E-05 | 1.22E-08 | 1.47E-06 | 4.08E-09 | 0        |
| X0acS1unR3unK5unK8acK12unK16unK20me3  | 3.33E-09 | 2.9E-06  | 1.67E-08 | 3.81E-05 | 1.29E-06 | 0        | 5.77E-09 | 4.34E-06 | 1.21E-08 | 6.93E-05 | 2.98E-06 | 0        |
| X0acS1unR3me1K5unK8unK12unK16unK20me3 | 1.88E-06 | 0        | 4.16E-06 | 1.97E-05 | 1.36E-05 | 1E-08    | 3.25E-06 | 0        | 5.91E-06 | 2.37E-05 | 1.98E-05 | 1.41E-08 |
| X0unS1unR3unK5unK8unK12unK16unK20me3  | 2.87E-07 | 0        | 1.99E-05 | 3.25E-06 | 2.95E-06 | 1.12E-05 | 1.8E-07  | 0        | 2.87E-05 | 6.5E-06  | 3.62E-06 | 1.46E-05 |
| X0acS1unR3unK5acK8acK12unK16unK20me1  | 9.37E-06 | 0        | 8.61E-06 | 0        | 2.1E-05  | 1E-08    | 8.55E-06 | 0        | 6.67E-06 | 0        | 4.36E-05 | 2E-08    |
| X0unS1unR3me1K5unK8unK12unK16acK20me3 | 1.27E-05 | 2.56E-06 | 4.9E-06  | 3.17E-06 | 1.9E-05  | 3.78E-06 | 4.74E-06 | 4.42E-06 | 7.37E-06 | 5.39E-06 | 1.23E-05 | 7.46E-06 |

|                                       |          |          |          |          |          |          |          |          |          |          |          |          |
|---------------------------------------|----------|----------|----------|----------|----------|----------|----------|----------|----------|----------|----------|----------|
| X0unS1phR3me1K5unK8unK12unK16unK20me2 | 2.33E-08 | 6.85E-05 | 7.5E-08  | 3.04E-05 | 1.93E-07 | 1.13E-07 | 5.77E-09 | 2.46E-05 | 1.55E-07 | 3.47E-05 | 2.35E-07 | 2.25E-07 |
| X0acS1phR3unK5ack8unK12acK16unK20me3  | 6.67E-09 | 1.52E-05 | 0        | 8.14E-05 | 0        | 0        | 1.15E-08 | 2.64E-05 | 0        | 0.000151 | 0        | 0        |
| X0unS1phR3me1K5unK8ack12acK16ack20me2 | 0        | 0.000136 | 8.33E-09 | 2.29E-05 | 1E-08    | 0        | 0        | 0.000229 | 2.04E-08 | 2.02E-05 | 1.26E-08 | 0        |
| X0acS1unR3unK5ack8ack12unK16unK20un   | 1E-08    | 0.000116 | 1E-08    | 3.1E-05  | 1.38E-05 | 0        | 1.73E-08 | 2.3E-05  | 1.67E-08 | 3.58E-05 | 3.38E-05 | 0        |
| X0acS1unR3me1K5unK8unK12unK16ack20me3 | 3.5E-06  | 7.08E-06 | 4.82E-05 | 3E-05    | 2.88E-05 | 1.45E-06 | 5.8E-06  | 8.7E-06  | 6.71E-05 | 2.59E-05 | 3.44E-05 | 2.74E-06 |
| X0acS1unR3me1K5unK8unK12unK16unK20me1 | 6.33E-08 | 0.000144 | 1.4E-06  | 2.83E-05 | 2.74E-05 | 5.65E-06 | 1.01E-07 | 0.000125 | 1.26E-06 | 2E-05    | 2.57E-05 | 6.92E-06 |
| X0acS1unR3me1K5unK8unK12unK16ack20me1 | 9.81E-06 | 0        | 4.88E-06 | 0        | 0.000123 | 0        | 1.7E-05  | 0        | 7.73E-06 | 0        | 0.000302 | 0        |
| X0unS1phR3unK5unK8unK12unK16ack20un   | 0        | 0        | 0.000153 | 0        | 0        | 0        | 0        | 0        | 0.000374 | 0        | 0        | 0        |
| X0unS1unR3unK5ack8unK12unK16ack20me2  | 0.000119 | 5.27E-07 | 4.94E-05 | 3.26E-05 | 1.38E-05 | 3.49E-05 | 5.67E-05 | 4.8E-07  | 3.38E-05 | 4.77E-05 | 3.37E-05 | 5.12E-05 |
| X0acS1phR3unK5unK8unK12unK16ack20me1  | 1.31E-05 | 0        | 8.37E-06 | 3.03E-07 | 0.00017  | 0        | 9.95E-06 | 0        | 1.92E-05 | 6.05E-07 | 0.00027  | 0        |
| X0unS1phR3unK5unK8unK12acK16unK20un   | 0.0003   | 0        | 0.000207 | 2.5E-09  | 2.31E-05 | 0        | 0.000263 | 0        | 0.000265 | 5E-09    | 3.67E-05 | 0        |
| X0unS1unR3me1K5ack8ack12unK16unK20me2 | 0        | 0.000911 | 3.35E-07 | 0        | 0        | 0        | 0        | 0.000293 | 8.21E-07 | 0        | 0        | 0        |
| X0unS1phR3unK5ack8ack12acK16unK20me3  | 0        | 0.0003   | 0        | 0.00053  | 1.67E-09 | 0        | 0        | 0.000445 | 0        | 0.00106  | 4.08E-09 | 0        |
| X0acS1unR3unK5ack8unK12unK16unK20un   | 0.00219  | 0.007246 | 0.001288 | 0.001623 | 0.000617 | 0.000556 | 0.000805 | 0.000395 | 0.00125  | 0.000448 | 0.000526 | 0.000383 |
